# Supplementary material
Source: PubMed Central journal article supplement (PMC9874903)
Supplement: JEP-29--s001.pdf [file JEP-29--s001.pdf]

## Appendix 1

[Table 1 in the main manuscript shows the baseline characteristics of the covariates used in the analysis. Most variables were not balanced making the analysis based on unadjusted comparison potentially biased.]

**App Fig 1a.** Comparison of effect of FFT-algorithm vs. management off the algorithm on a primary outcome: **probability of death**. *Left figure*: unadjusted analysis; *right figure*: adjusted analysis. While unadjusted analysis indicates statistically significant effect in favor of using FFT-algorithm, no such effect was observed in the adjusted analysis.

**App Fig 1b.** Diagnostics for overlap assumption and for balance in the covariate distribution between treated (on FFT-algorithm) and untreated (off FFT-algorithm) for primary outcome: **probability of death**. *Left figure* shows no violation of overlap assumption (which requires an overlap between the treatment and control to meet requirement of exchangeability with respect to all covariates included in the model); *right figure* shows standardized differences before and after propensity score weighting. As it can be seen all variables retained in the analyses were well balanced with  $SMD < 0.1$ .

**App Fig 2a.** Comparison of effect of FFT-algorithm vs. management off the algorithm on a primary outcome: **probability of VTE (venous thromboembolism)**. *Left figure*: unadjusted analysis; *right figure*: adjusted analysis. There is no difference in effects between two management strategies on VTE in either unadjusted or adjusted analysis.

**App Fig 2b.** Diagnostics for overlap assumption and for balance in the covariate distribution between treated (on FFT-algorithm) and untreated (off FFT-algorithm) for primary outcome: **probability of VTE**. *Left figure* shows no violation of overlap assumption (which requires an overlap between the treatment and control to meet requirement of exchangeability with respect to all covariates included in the model); *right figure* shows standardized differences before and after propensity score weighting. As it can be seen all variables retained in the analyses were well balanced with  $SMD < 0.1$ .

**App Fig 3a.** Comparison of effect of FFT-algorithm vs. management off the algorithm on a primary outcome: **probability of major bleeding**. *Left figure*: unadjusted analysis; *right figure*: adjusted analysis. There is no difference in effects between two management strategies on major bleeding in either unadjusted or adjusted analysis.

**App Fig 3b.** Diagnostics for overlap assumption and for balance in the covariate distribution between treated (on FFT-algorithm) and untreated (off FFT-algorithm) for primary outcome: **probability of major bleeding**. *Left figure* shows no violation of overlap assumption (which requires an overlap between the treatment and control to meet requirement of exchangeability with respect to all covariates included in the model); *right figure* shows standardized differences before and after propensity score weighting. As it can be seen all variables retained in the analyses were well balanced with  $SMD < 0.1$ .

**App Fig 4a** Comparison of effect of FFT-algorithm vs. management off the algorithm on secondary outcomes: **probability of hospital length of stay >10 days**. Compared with the usual care, FFT-based strategy helped avoid stay in the hospital longer than 10 days by about 3.2% (95% CI: 0.1% to 6.3%) in unadjusted analysis (left figure) and 2.5% (95%CI 0.7 to 4%) in adjusted analysis (*right figure*). This converts into the number of patients needed to be treated

(NNT)=31 (95%CI: 16 to 1,000) in unadjusted analysis [indicating that for every 31 patients (16 to 1,000) managed on FFT algorithm, one avoided staying in hospital longer than 10 days. In adjusted analysis NNT= 40 (95%CI: 23 to 143).

**App Fig 4b.** Diagnostics for overlap assumption and for balance in the covariate distribution between treated (on FFT-algorithm) and untreated (off FFT-algorithm) for primary outcome: **probability of hospital length of stay >10 days**. *Left figure* shows no violation of overlap assumption (which requires an overlap between the treatment and control to meet requirement of exchangeability with respect to all covariates included in the model); *right figure* shows standardized differences before and after propensity score weighting. As it can be seen all variables retained in the analyses were well balanced with SMD<0.1.

**App Fig 5a** Comparison of effect of FFT-algorithm vs. management off the algorithm on secondary outcomes: **probability of ICU admission**. Compared with the usual care, FFT-based strategy helped avert admission to intensive-care unit (ICU) by about 8% (95%CI: 4 to 11%) in unadjusted analysis (left figure) and by about 5% (95%CI 2.5 to 8%) in adjusted analysis (*right figure*). This converts into the number of patients needed to be treated to avert one admission to ICU (NNT)=13 (95%CI: 9 to 25) in unadjusted and 19 (95%CI: 13 to 40) in adjusted analysis, respectively.

**App Fig 5b.** Diagnostics for overlap assumption and for balance in the covariate distribution between treated (on FFT-algorithm) and untreated (off FFT-algorithm) for primary outcome: **probability of ICU admission**. *Left figure* shows no violation of overlap assumption (which requires an overlap between the treatment and control to meet requirement of exchangeability with respect to all covariates included in the model); *right figure* shows standardized differences before and after propensity score weighting. As it can be seen all variables retained in the analyses were well balanced with SMD<0.1.

### Sensitivity analyses (SA)

#### A) missing data (BNP, D-dimer, LDH, CK)dropped

**App Fig 6a.** Comparison of effect of FFT-algorithm vs. management off the algorithm on a primary outcome: **probability of death**. *Left figure*: unadjusted analysis; *right figure*: adjusted analysis. No meaningful differences from the findings obtained in the main analysis was seen (App1 Fig 1)

**App Fig 6b.** Diagnostics for overlap assumption and for balance in the covariate distribution between treated (on FFT-algorithm) and untreated (off FFT-algorithm) for primary outcome: **probability of death**. *Left figure* shows no violation of overlap assumption (which requires an overlap between the treatment and control to meet requirement of exchangeability with respect to the all covariates included in the model); *right figure* shows standardized differences before and after propensity score weighting. As it can be seen all variables retained in the analyses were well balanced with SMD<0.1.

**App Fig 7a.** Comparison of effect of FFT-algorithm vs. management off the algorithm on a primary outcome: **probability of VTE (venous thromboembolism)**. *Left figure*: unadjusted analysis; *right figure*: adjusted analysis. No meaningful differences from the findings obtained in the main analysis was seen (App1 Fig 2)

**App Fig 7b.** Diagnostics for overlap assumption and for balance in the covariate distribution between treated (on FFT-algorithm) and untreated (off FFT-algorithm) for primary outcome: **probability of VTE**. *Left figure* shows no violation of overlap assumption (which requires an overlap between the treatment and control to meet requirement of exchangeability with respect to all covariates included in the model); *right figure* shows standardized differences before and after propensity score weighting. As it can be seen all variables retained in the analyses were well balanced with  $SMD < 0.1$ .

**App Fig 8a.** Comparison of effect of FFT-algorithm vs. management off the algorithm on a primary outcome: **probability of major bleeding**. *Left figure*: unadjusted analysis; *right figure*: adjusted analysis. No meaningful differences from the findings obtained in the main analysis was seen (App1 Fig 3)

**App Fig 8b.** Diagnostics for overlap assumption and for balance in the covariate distribution between treated (on FFT-algorithm) and untreated (off FFT-algorithm) for primary outcome: **probability of major bleeding**. *Left figure* shows no violation of overlap assumption (which requires an overlap between the treatment and control to meet requirement of exchangeability with respect to all covariates included in the model); *right figure* shows standardized differences before and after propensity score weighting. As it can be seen all variables retained in the analyses were well balanced with  $SMD < 0.1$ .

## **B) Dropping the data (“AC switch”) with potentially invalid ascertainment of the exposure (i.e., prophylactic vs. therapeutic assignment; “AC switch”)**

**App Fig 9a.** Comparison of effect of FFT-algorithm vs. management off the algorithm on a primary outcome: **probability of death**. *Left figure*: unadjusted analysis; *right figure*: adjusted analysis. No meaningful differences from the findings obtained in the main analysis was seen (App1 Fig 1)

**App Fig 9b.** Diagnostics for overlap assumption and for balance in the covariate distribution between treated (on FFT-algorithm) and untreated (off FFT-algorithm) for primary outcome: **probability of death**. *Left figure* shows no violation of overlap assumption (which requires an overlap between the treatment and control to meet requirement of exchangeability with respect to the all covariates included in the model); *right figure* shows standardized differences before and after propensity score weighting. As it can be seen all variables retained in the analyses were well balanced with  $SMD < 0.1$ .

**App Fig 10a.** Comparison of effect of FFT-algorithm vs. management off the algorithm on a primary outcome: **probability of VTE (venous thromboembolism)**. *Left figure*: unadjusted analysis; *right figure*: adjusted analysis. No meaningful differences from the findings obtained in the main analysis was seen (App1 Fig 2)

**App Fig 10b.** Diagnostics for overlap assumption and for balance in the covariate distribution between treated (on FFT-algorithm) and untreated (off FFT-algorithm) for primary outcome: **probability of VTE**. *Left figure* shows no violation of overlap assumption (which requires an overlap between the treatment and control to meet requirement of exchangeability with respect to all covariates included in the model); *right figure* shows standardized differences before and

after propensity score weighting. As it can be seen all variables retained in the analyses were well balanced with  $SMD < 0.1$ .

**App Fig 11a.** Comparison of effect of FFT-algorithm vs. management off the algorithm on a primary outcome: **probability of major bleeding**. *Left figure*: unadjusted analysis; *right figure*: adjusted analysis. No meaningful differences from the findings obtained in the main analysis was seen (App1 Fig 3)

**App Fig 11b.** Diagnostics for overlap assumption and for balance in the covariate distribution between treated (on FFT-algorithm) and untreated (off FFT-algorithm) for primary outcome: **probability of major bleeding**. *Left figure* shows no violation of overlap assumption (which requires an overlap between the treatment and control to meet requirement of exchangeability with respect to all covariates included in the model); *right figure* shows standardized differences before and after propensity score weighting. As it can be seen all variables retained in the analyses were well balanced with  $SMD < 0.1$ .

**[Similar results were obtained for secondary outcomes]**

# Effect of FFT algorithm on outcomes: death

## Unadjusted analyses

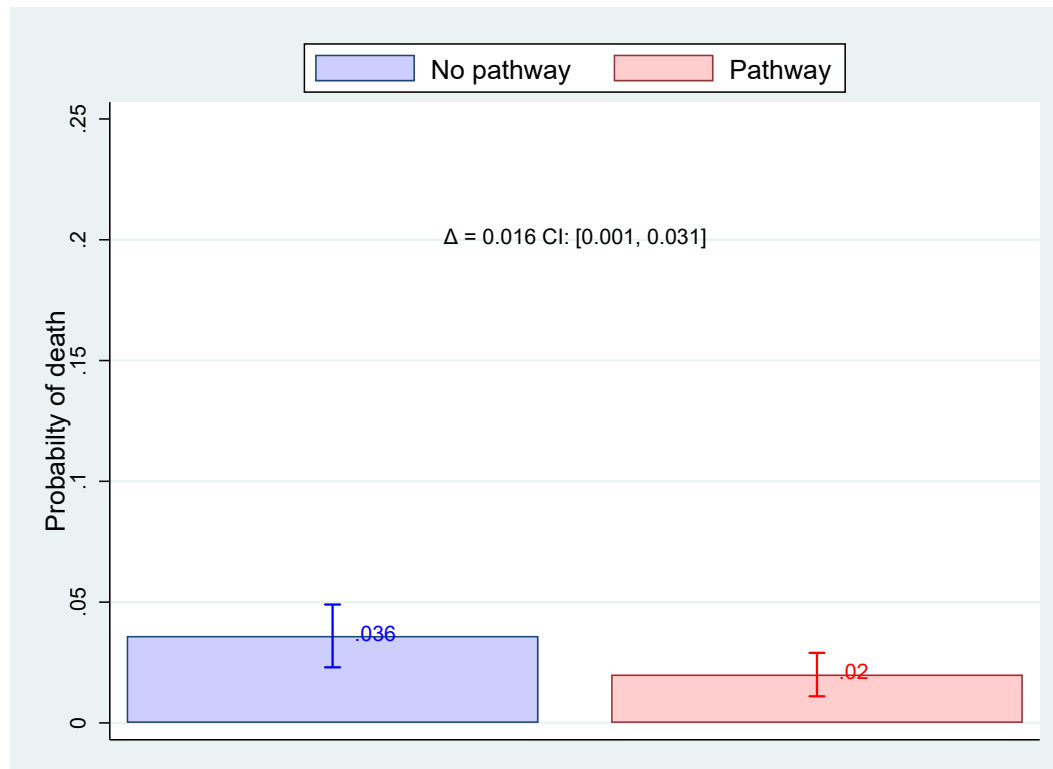

## Adjusted analyses

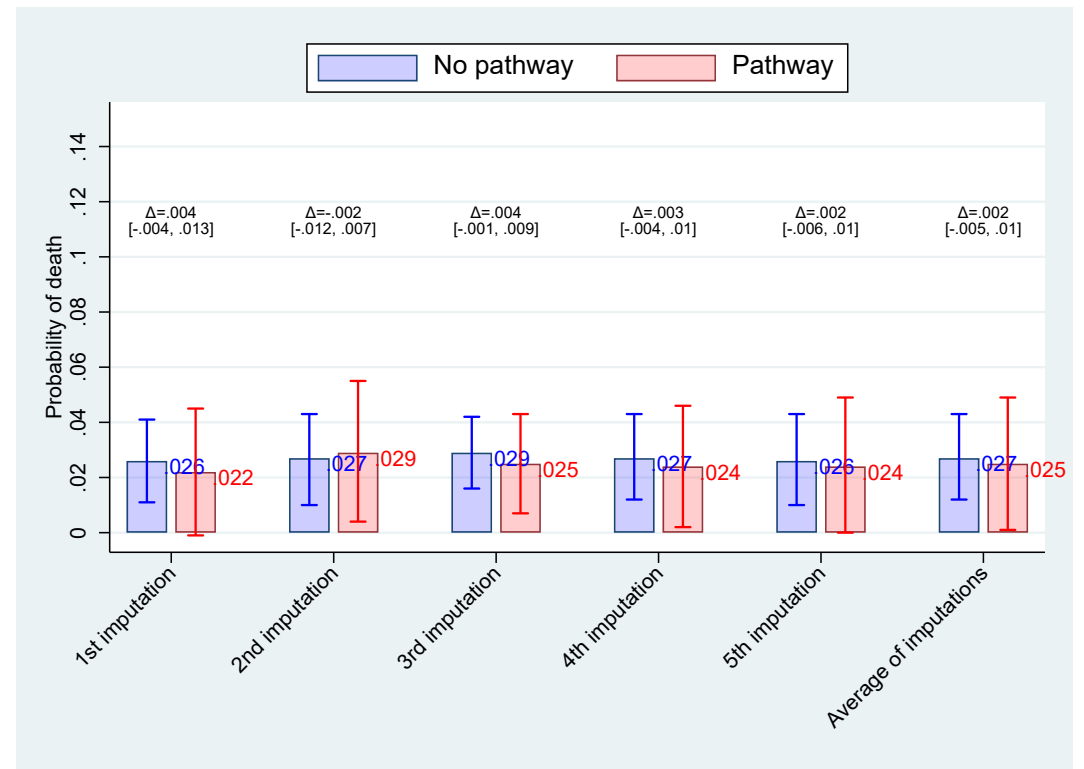

# Diagnostics for overlap assumption and for balance in the covariate distribution between treated (on FFT-algorithm) and untreated (off FFT-algorithm): death

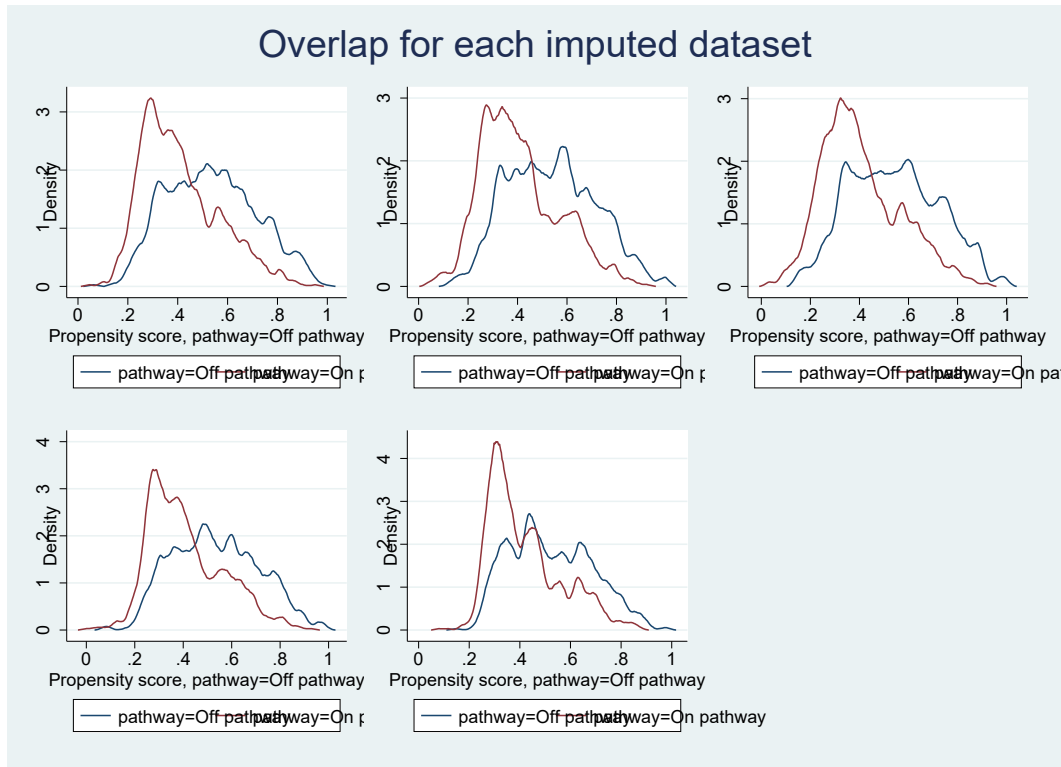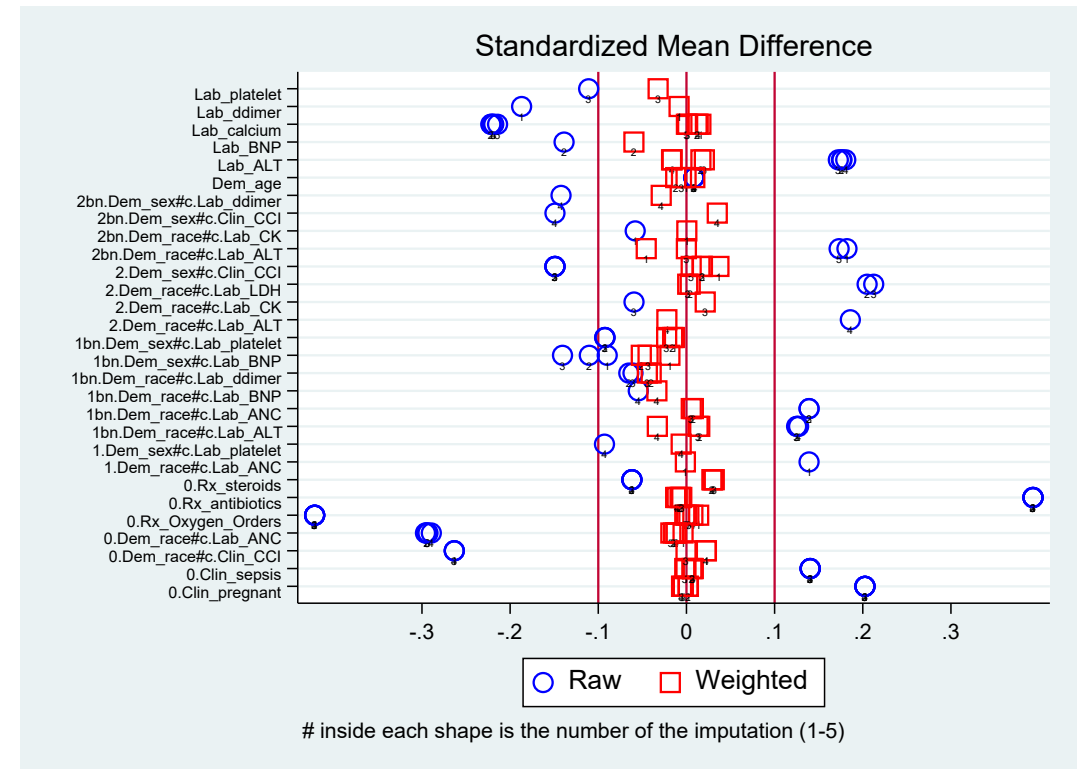

App Fig 1b

# Effect of FFT algorithm on outcomes: VTE

## Unadjusted

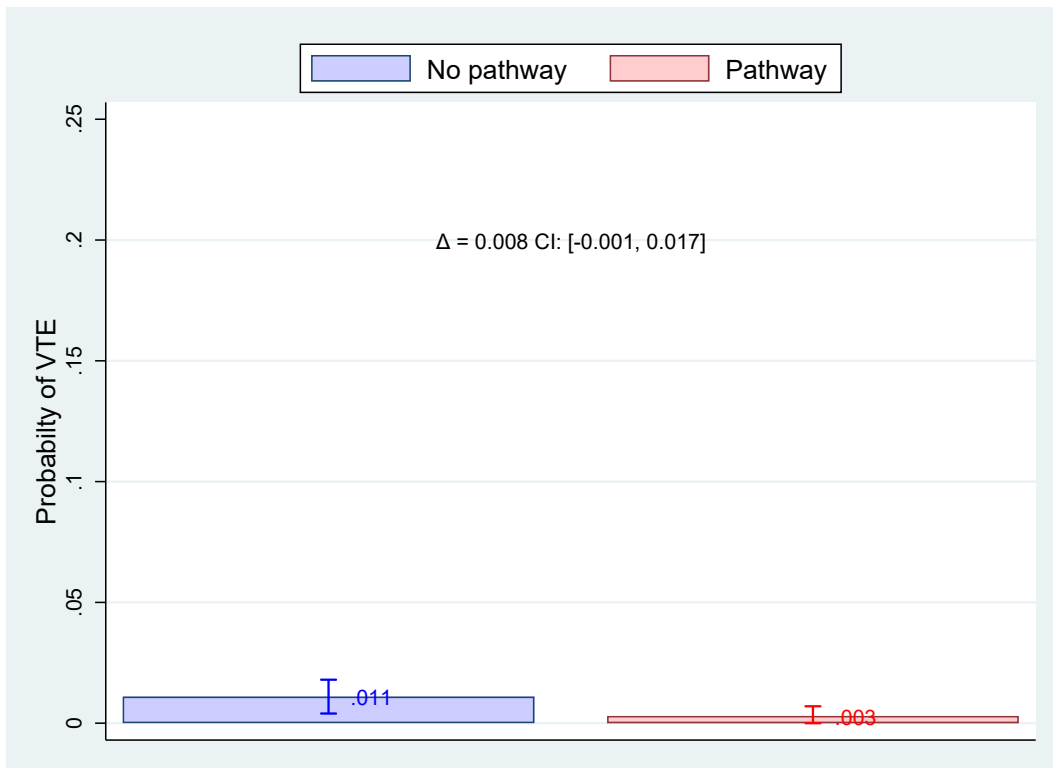

## Adjusted

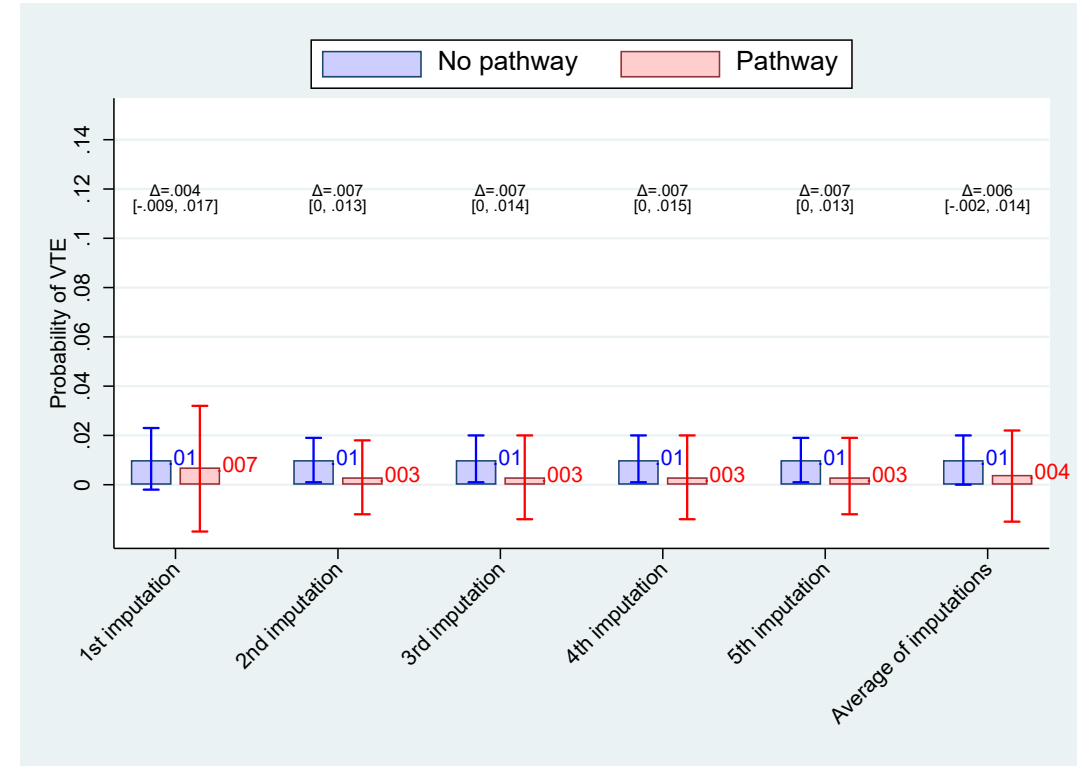

# Diagnostics for overlap assumption and for balance in the covariate distribution between treated (on FFT-algorithm) and untreated (off FFT-algorithm): VTE

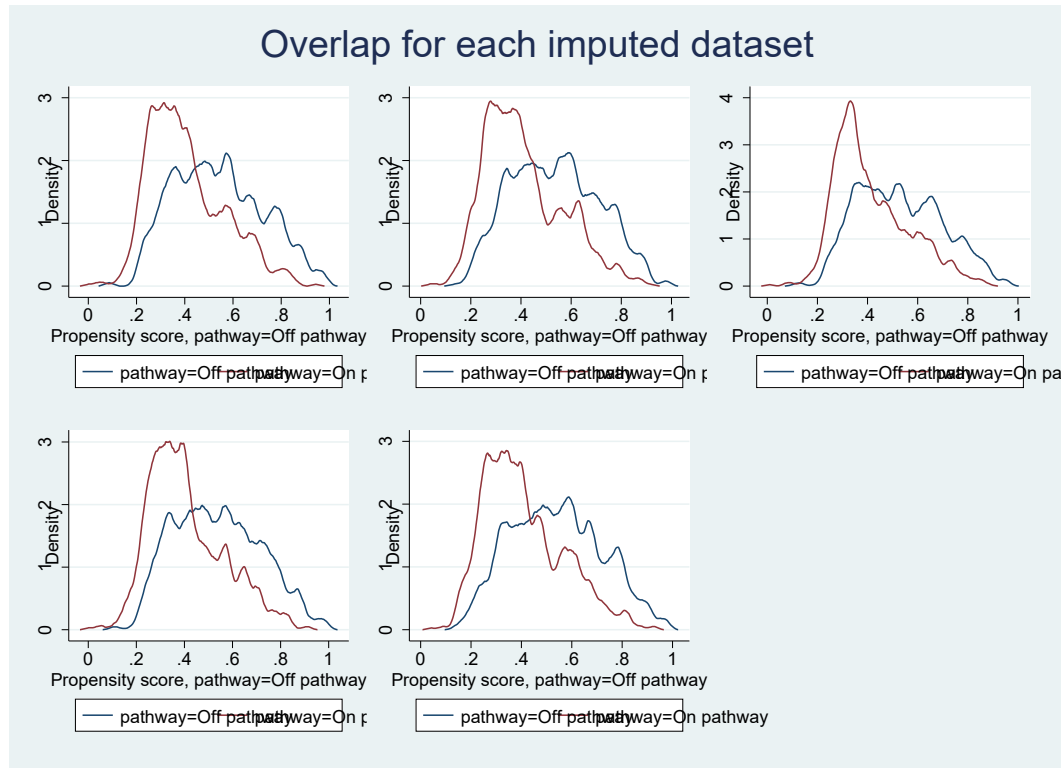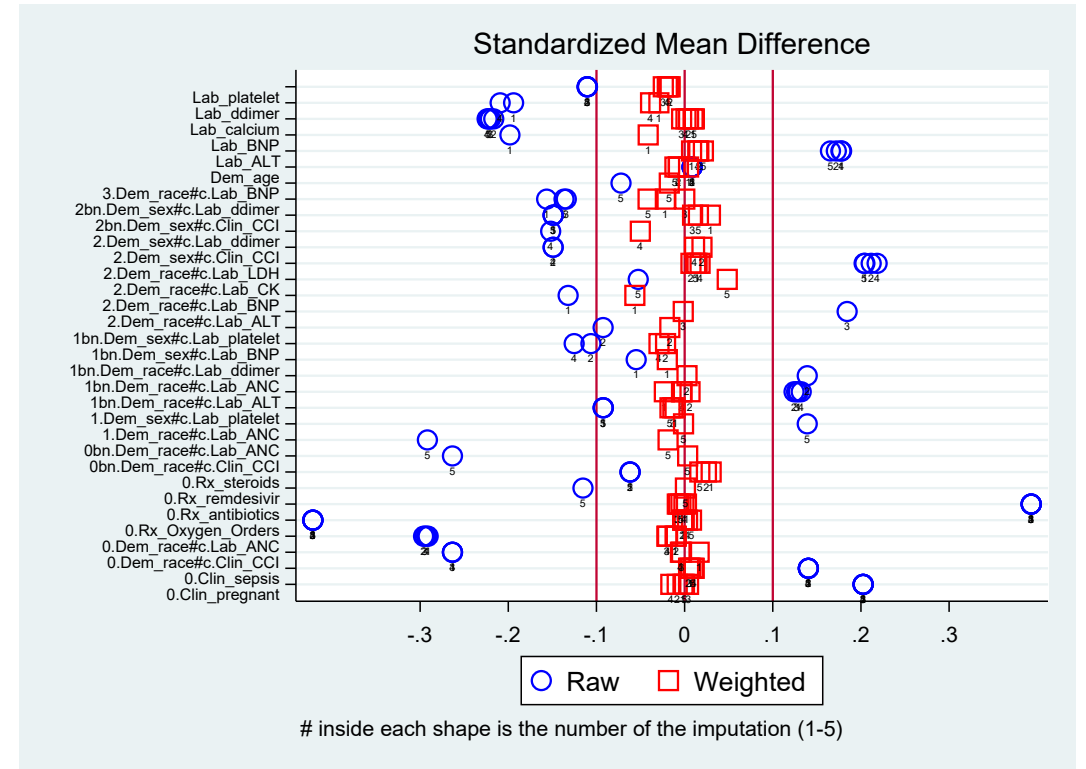



# Effect of FFT algorithm on outcomes: major bleed

## Unadjusted

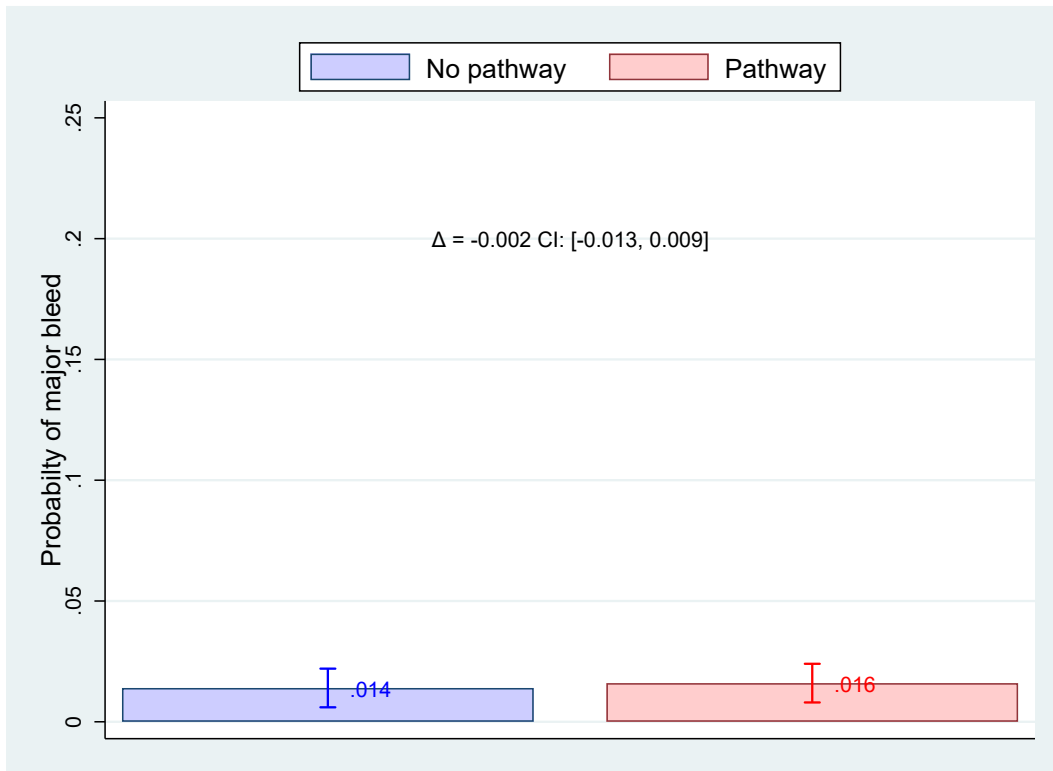

## Adjusted

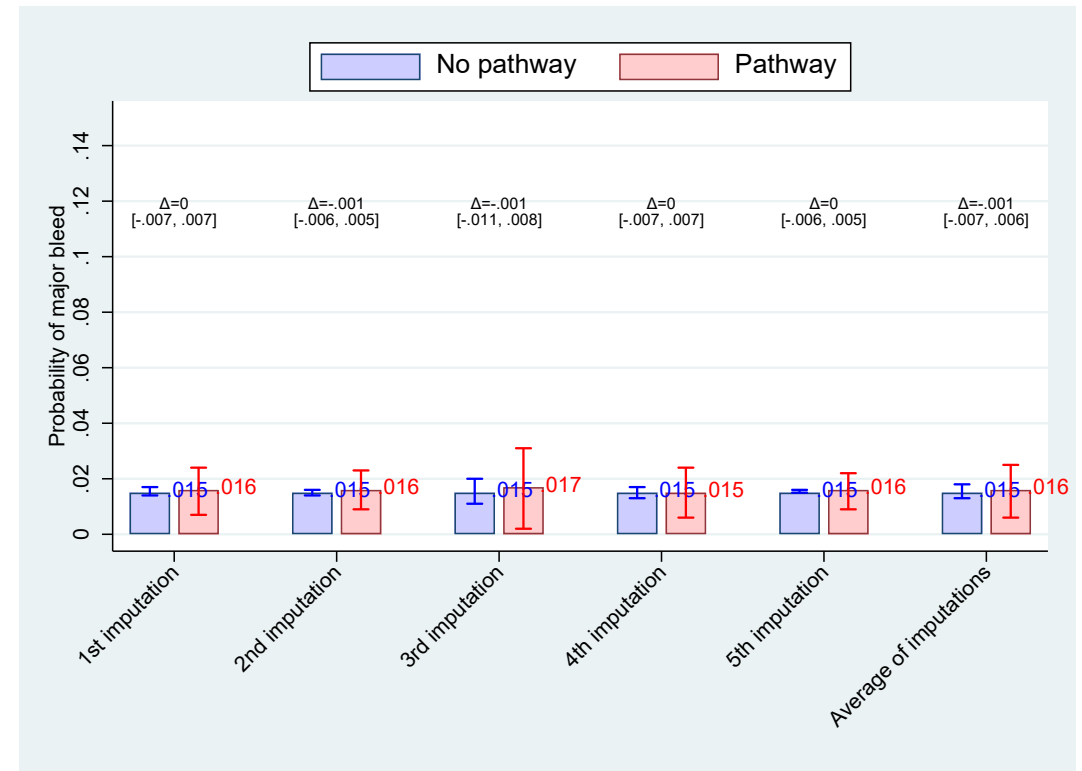

# Diagnostics for overlap assumption and for balance in the covariate distribution between treated (on FFT-algorithm) and untreated (off FFT-algorithm): major bleed

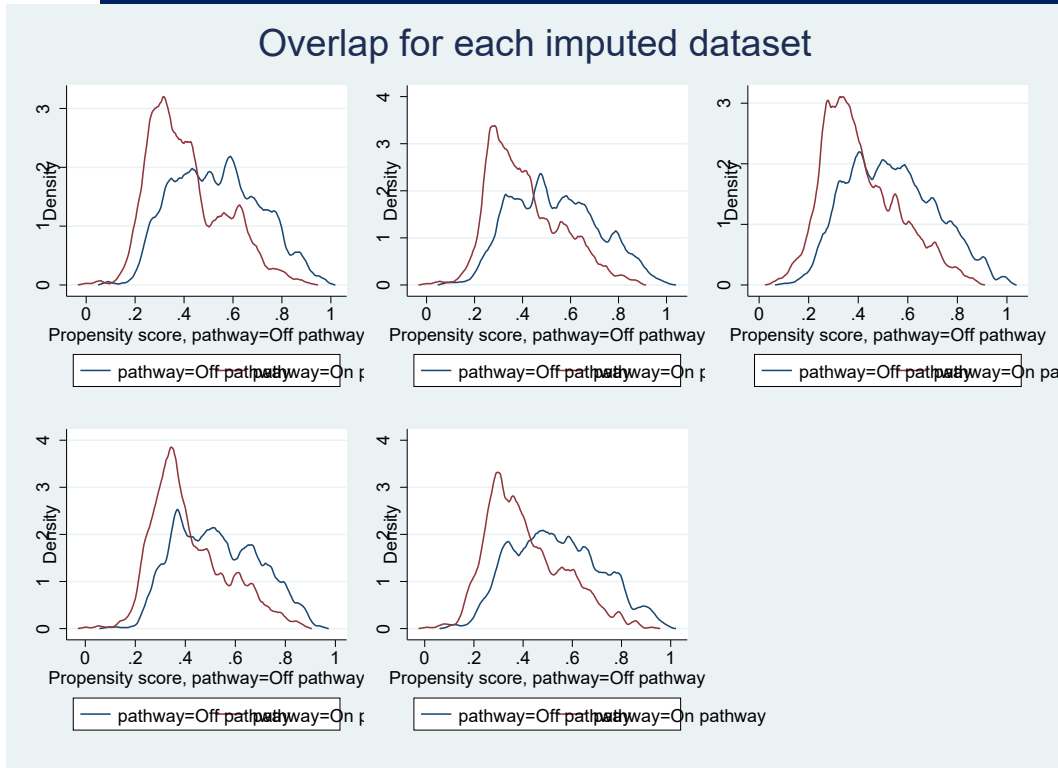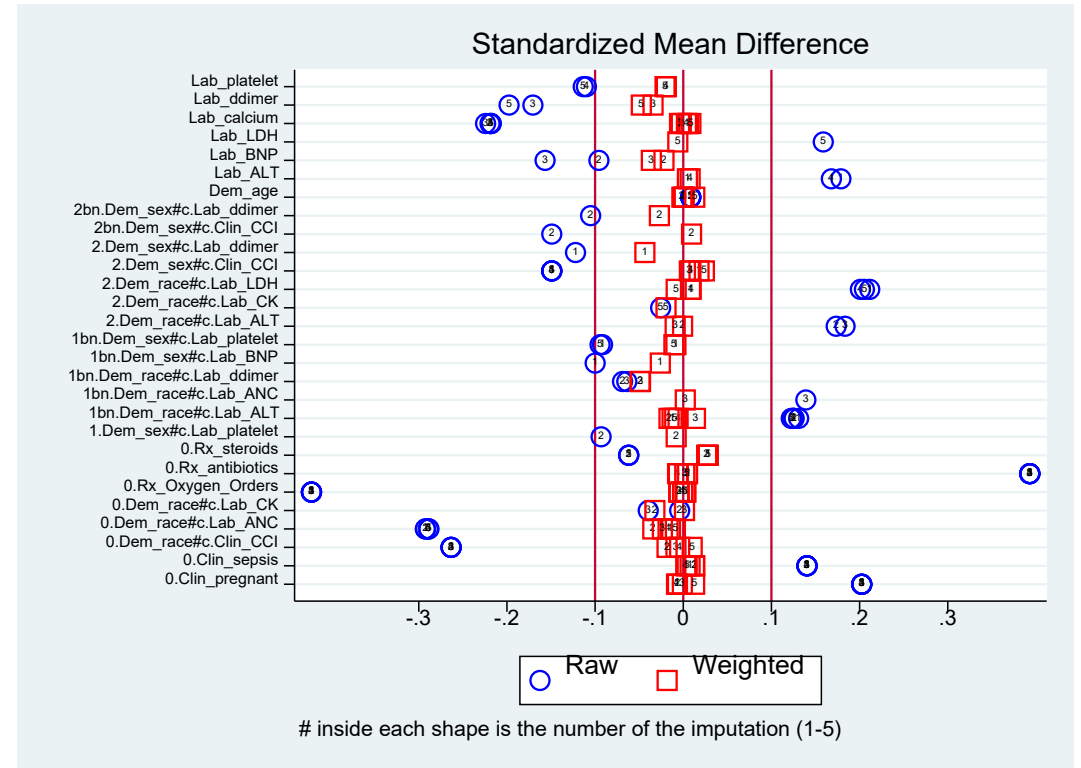

# Secondary outcomes: LOS (>10 days)

## Unadjusted

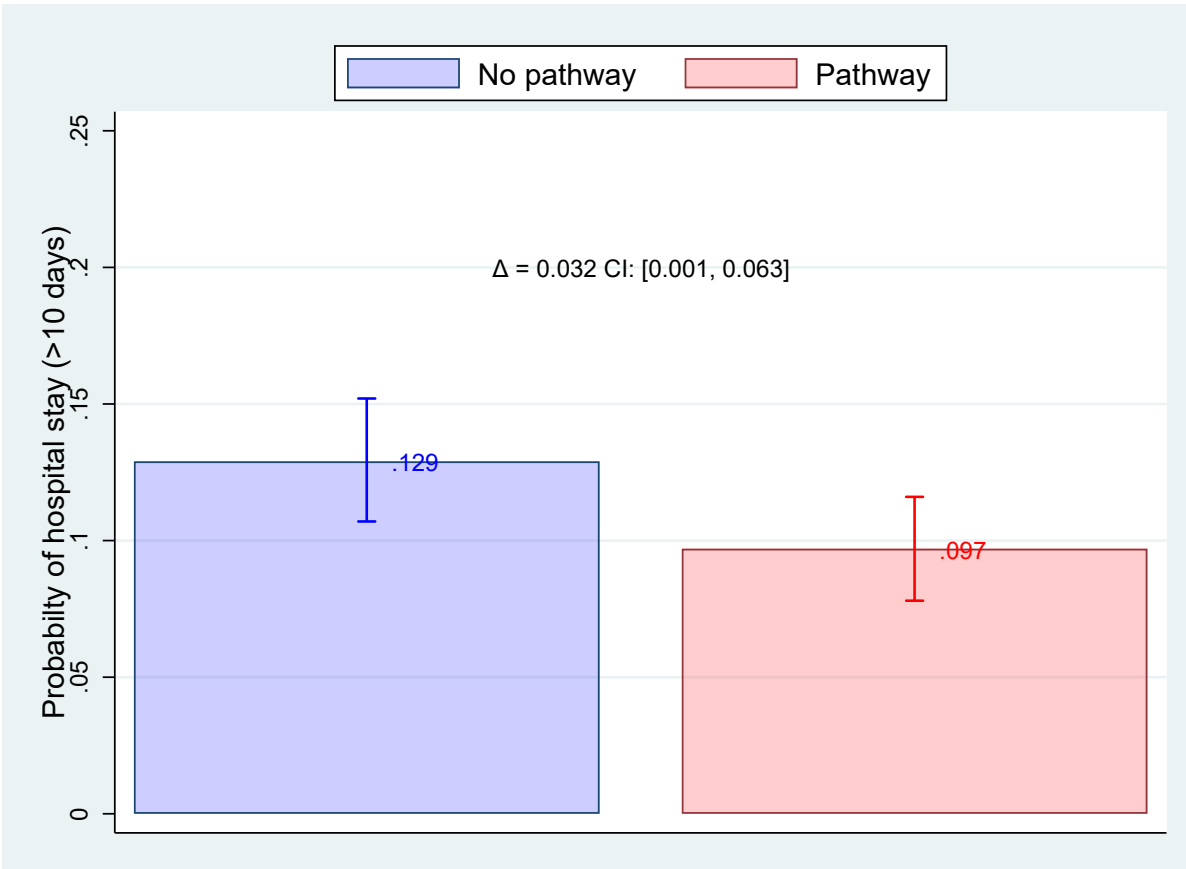

## Adjusted

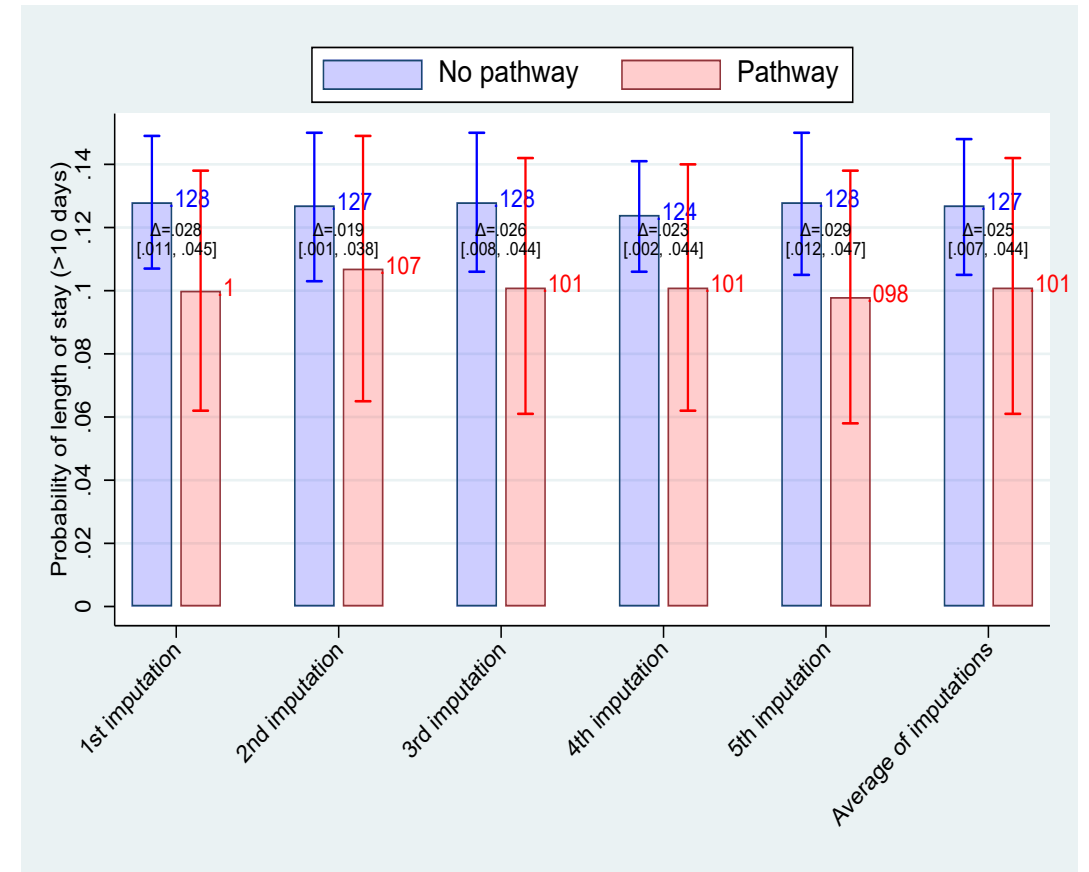

# Diagnostics for overlap assumption and for balance in the covariate distribution between treated (on FFT-algorithm) and untreated (off FFT-algorithm): LOS (>10 days)

Overlap for each imputed dataset

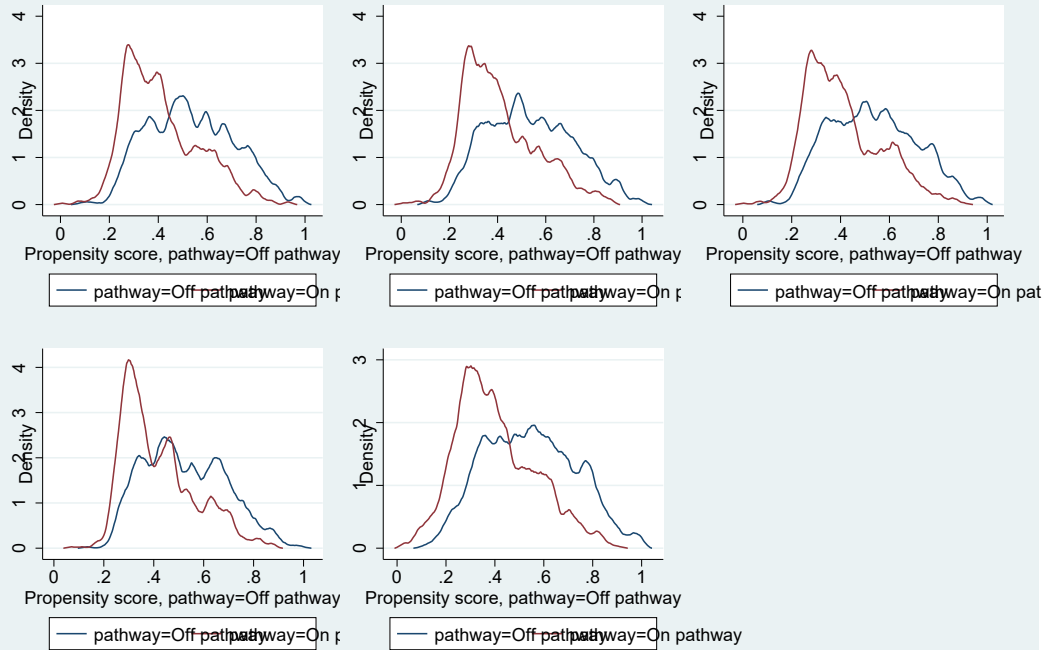

Standardized Mean Difference

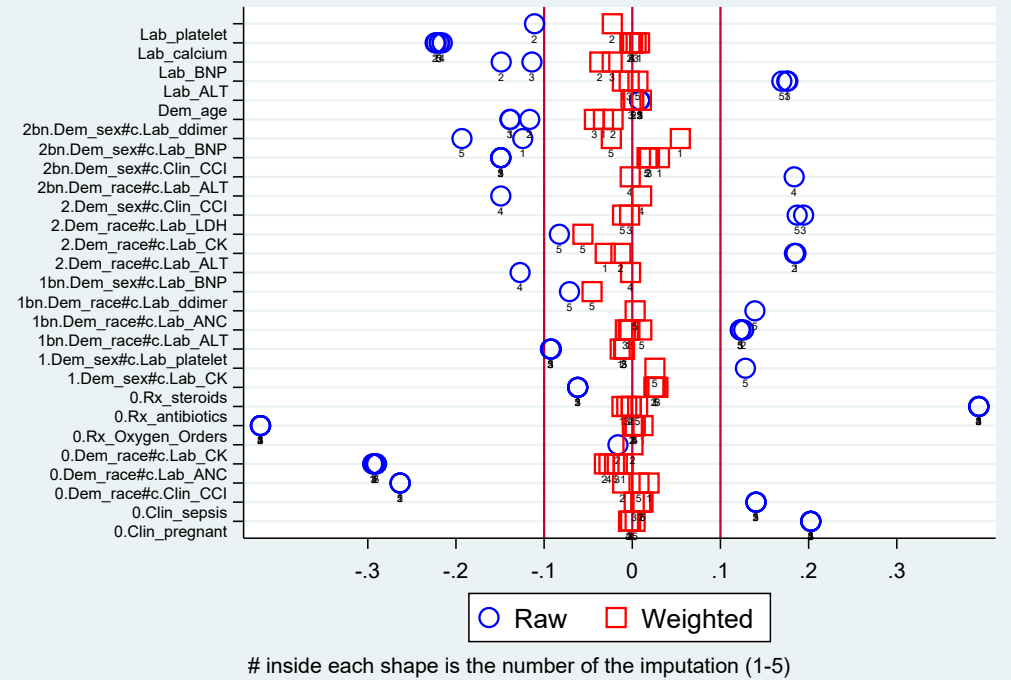

# Secondary outcomes: ICU admission

## Unadjusted

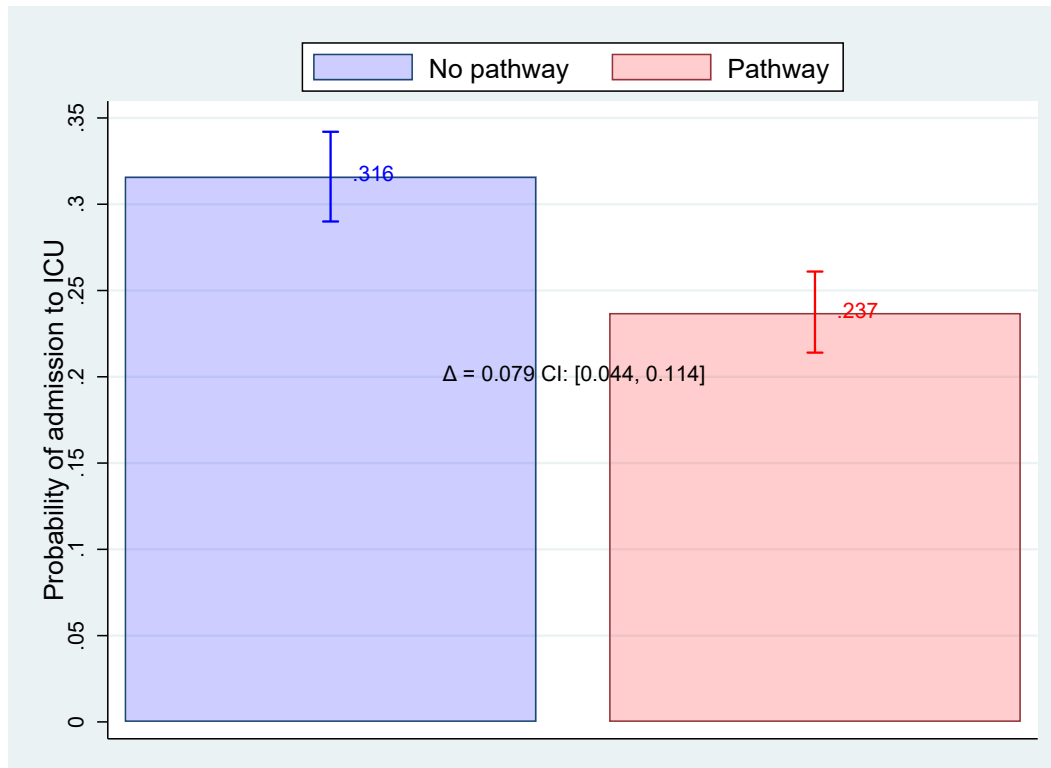

## Adjusted

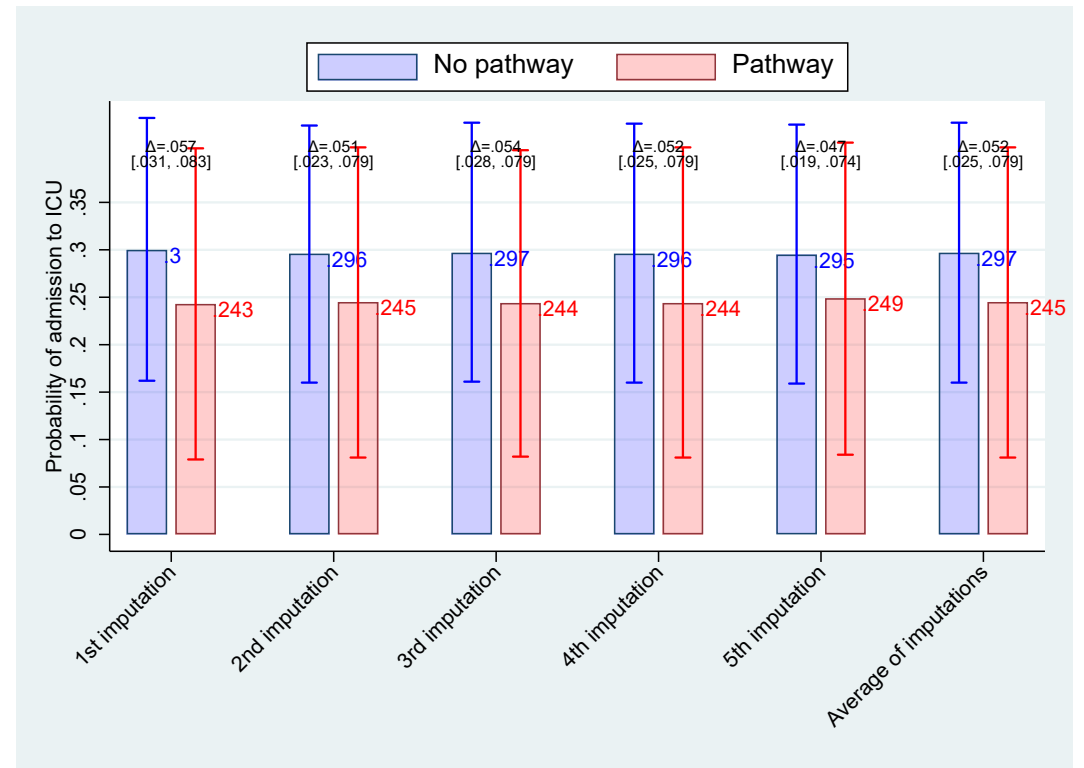

# Diagnostics for overlap assumption and for balance in the covariate distribution between treated (on FFT-algorithm) and untreated (off FFT-algorithm): ICU admission

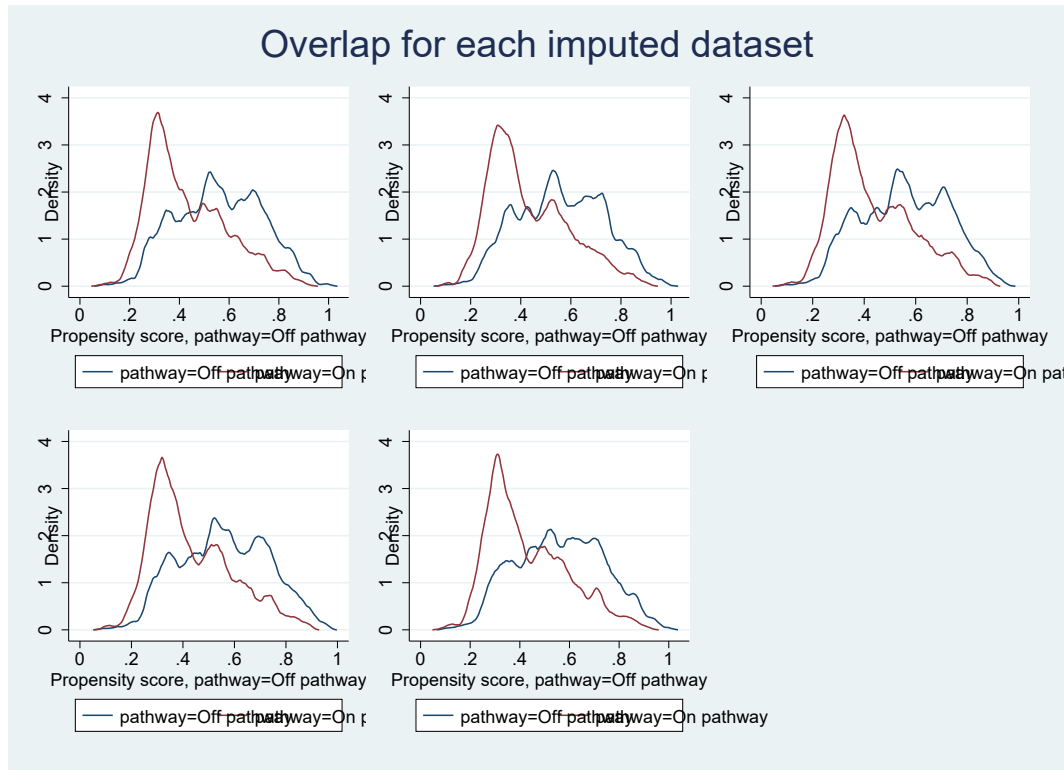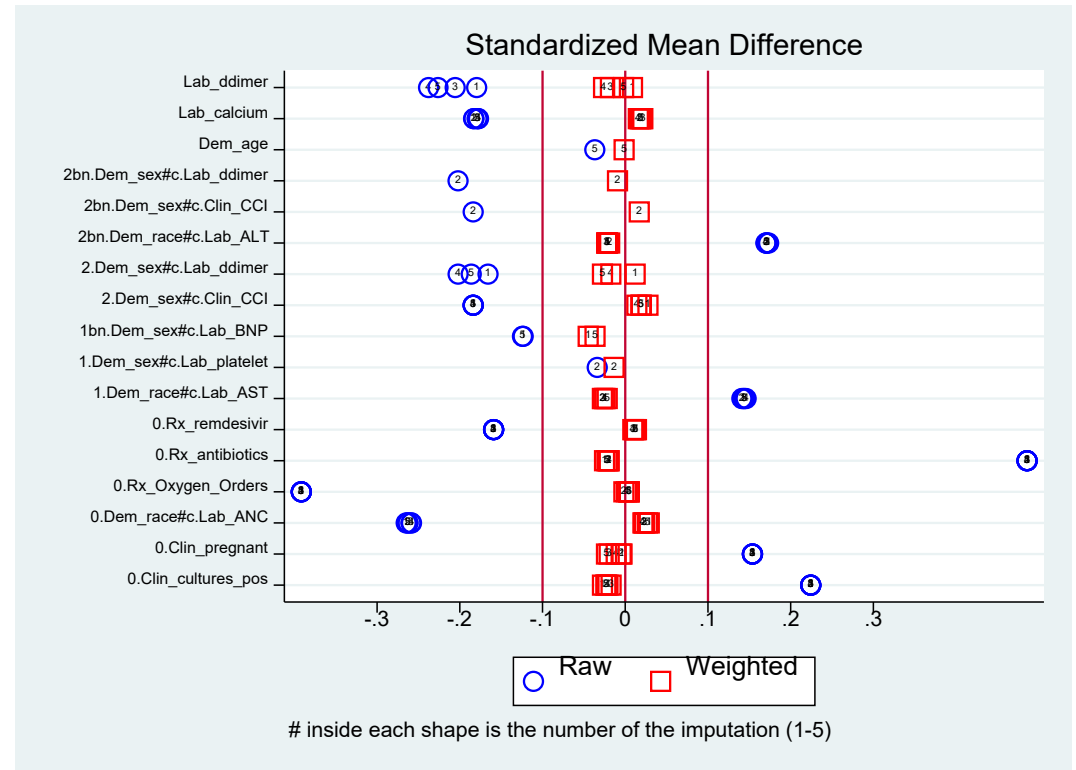

Sensitivity analyses (SA):  
A) missing data (BNP, D-dimer  
LDH, CK)dropped

# SA- Effect of FFT algorithm on outcomes: death

## All data

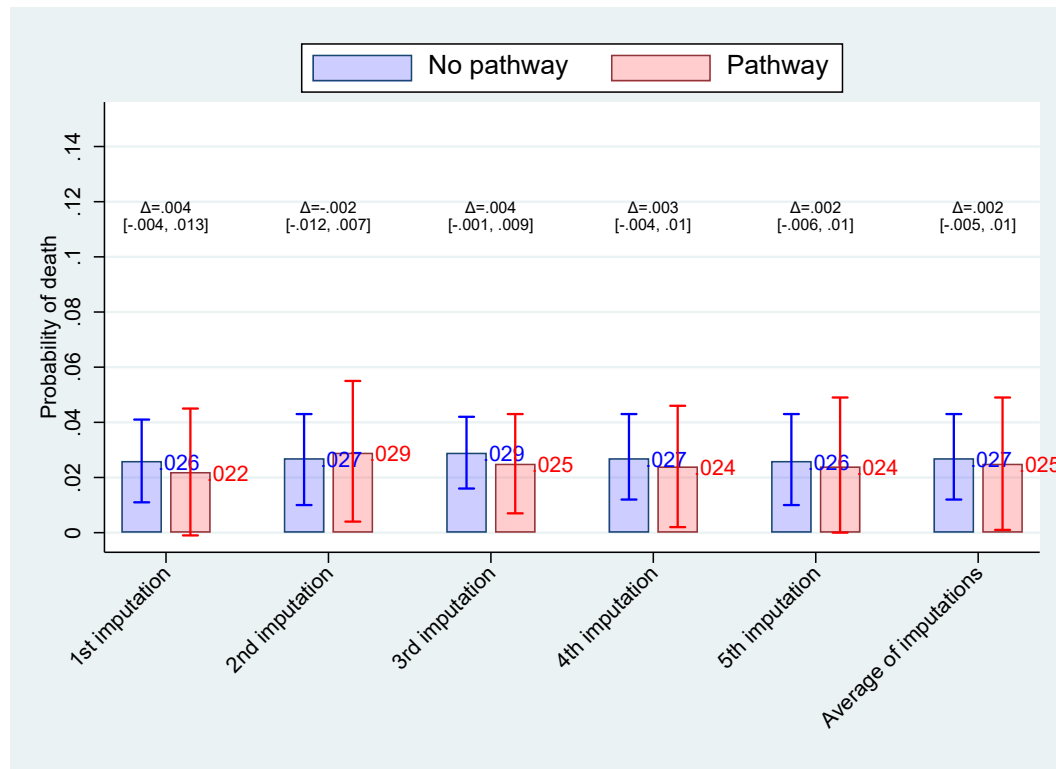

## After dropping (BNP, D-dimer, LDH, CK)

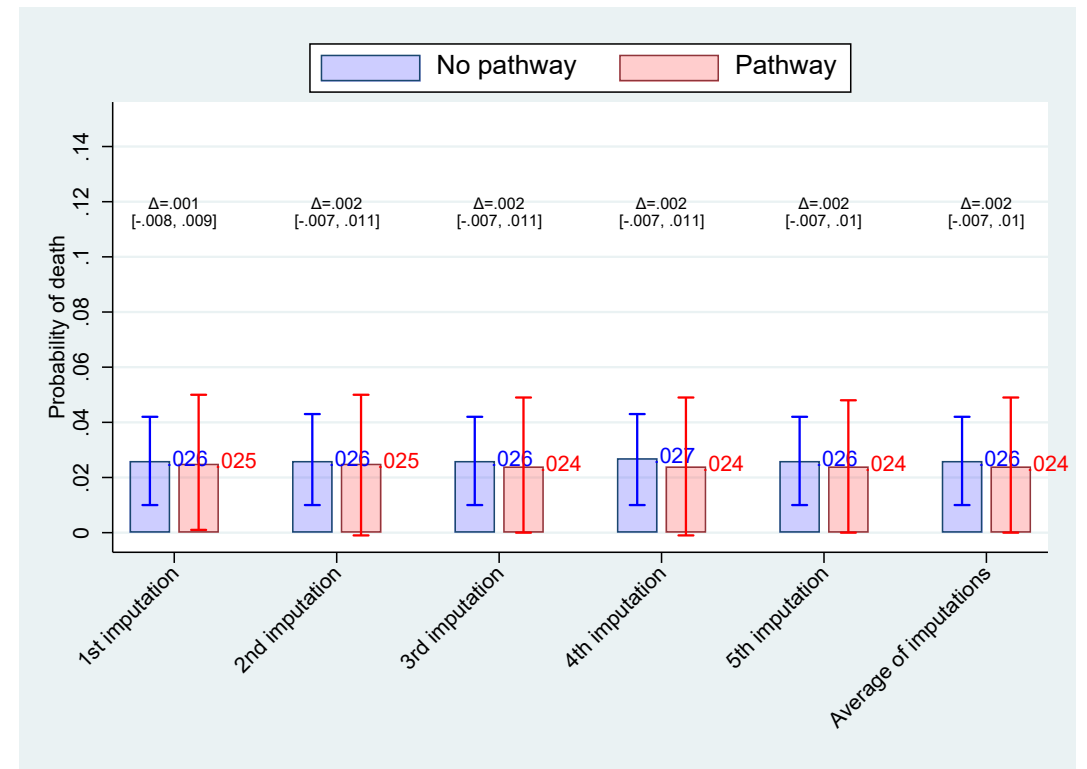



# SA-Diagnostics for overlap assumption and for balance in the covariate distribution between treated (on FFT-algorithm) and untreated (off FFT-algorithm): death

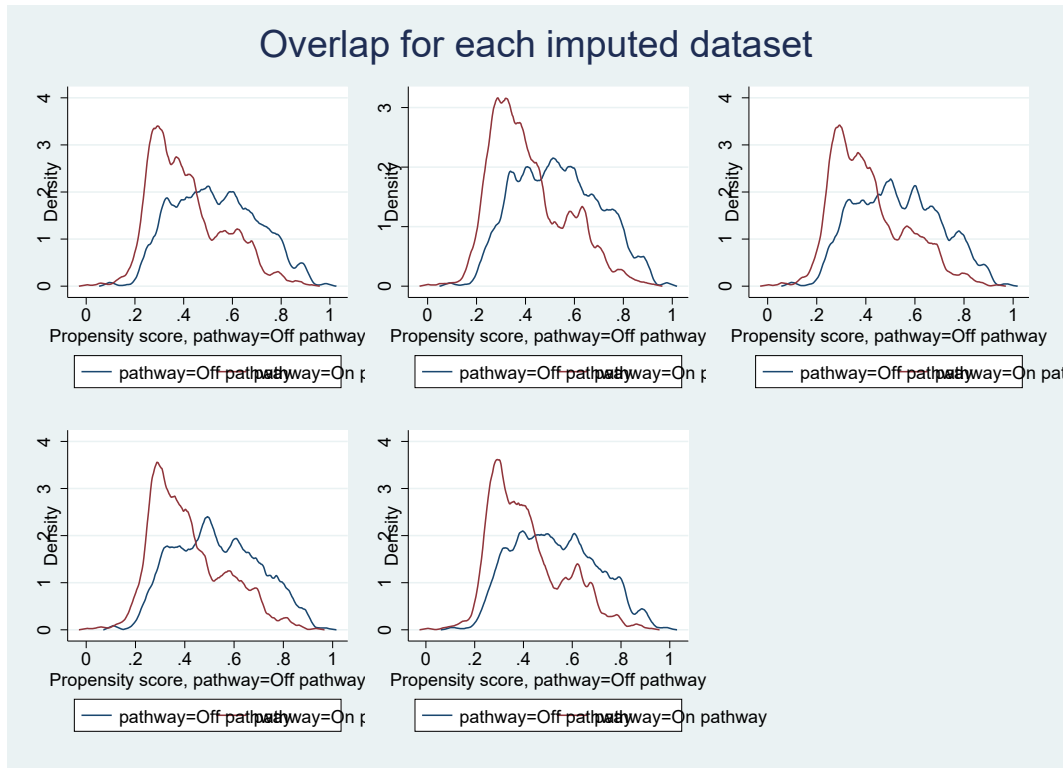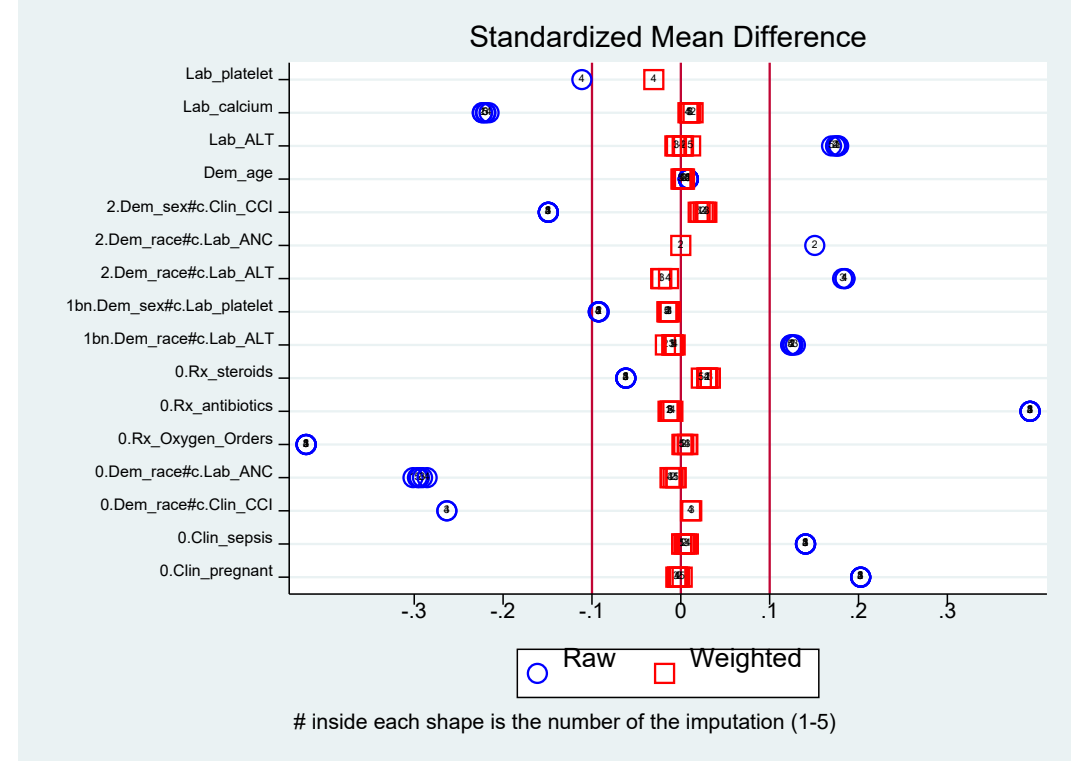

# SA-Effect of FFT algorithm on outcomes: VTE

## All data

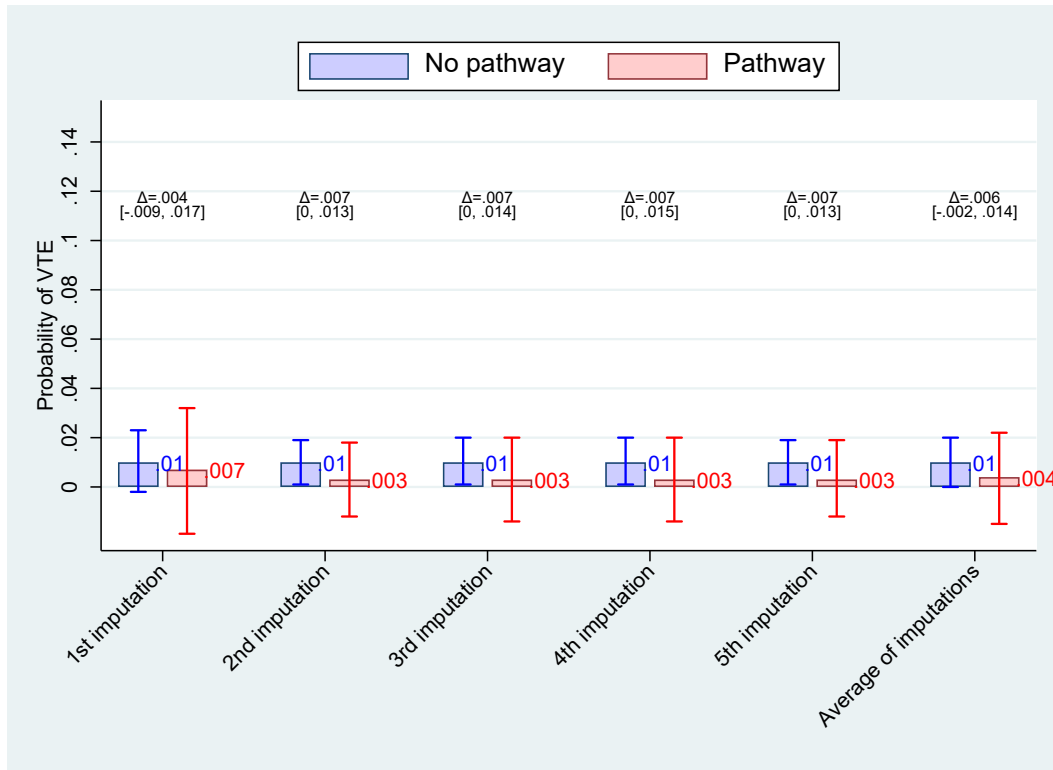

## After dropping (BNP, D-dimer, LDH, CK)

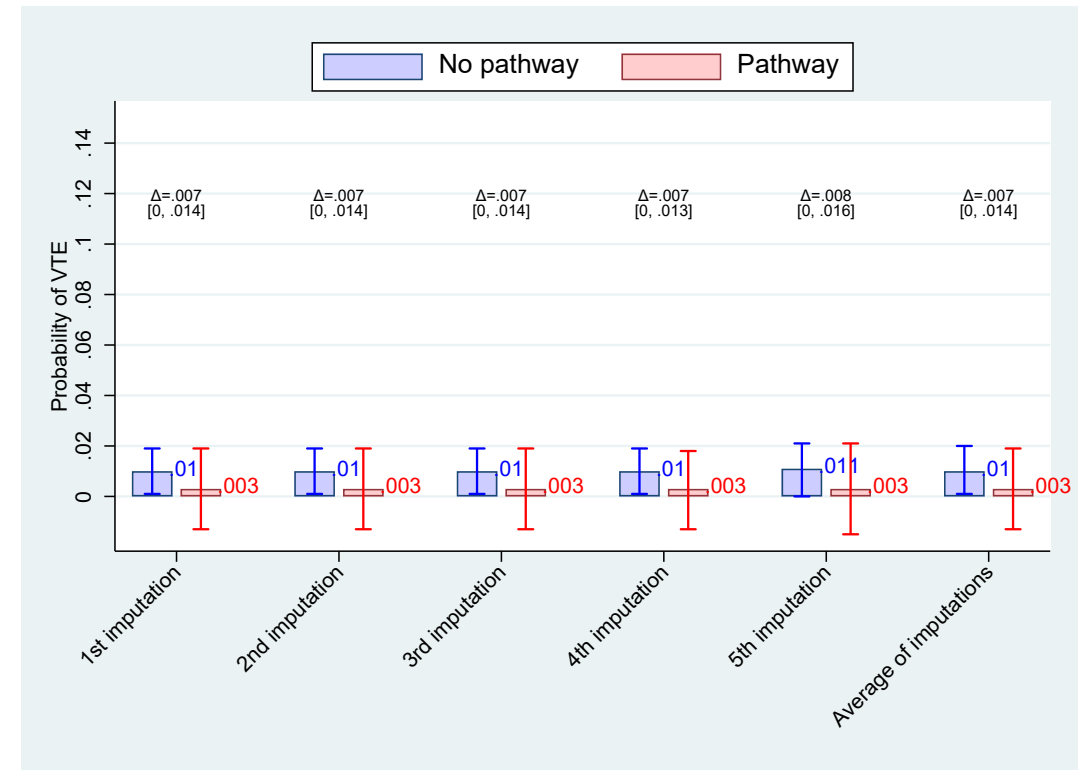

# SA-Diagnostics for overlap assumption and for balance in the covariate distribution between treated (on FFT-algorithm) and untreated (off FFT-algorithm): VTE

Overlap for each imputed dataset

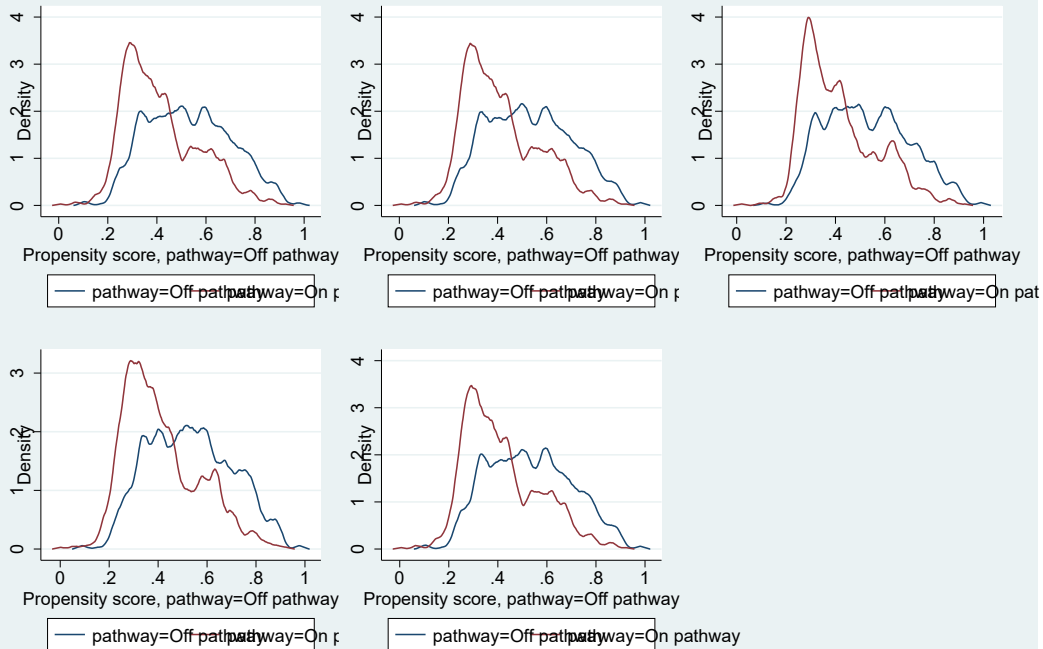

Standardized Mean Difference

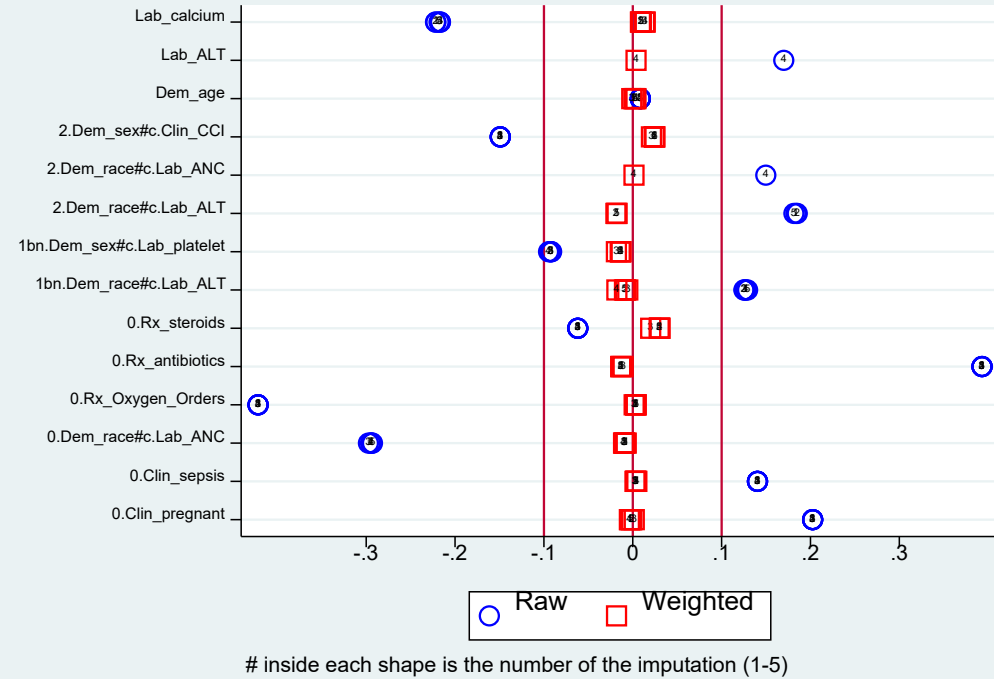

# SA-Effect of FFT algorithm on outcomes: major bleed

## All data

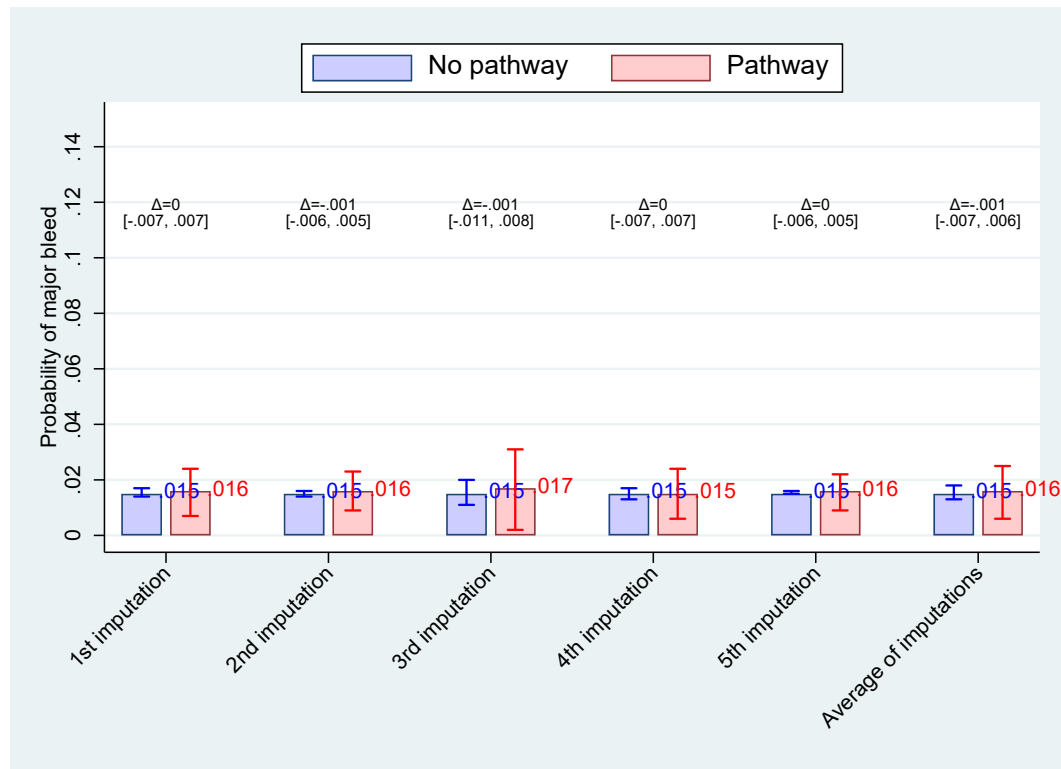

## After dropping (BNP, D-dimer, LDH, CK)

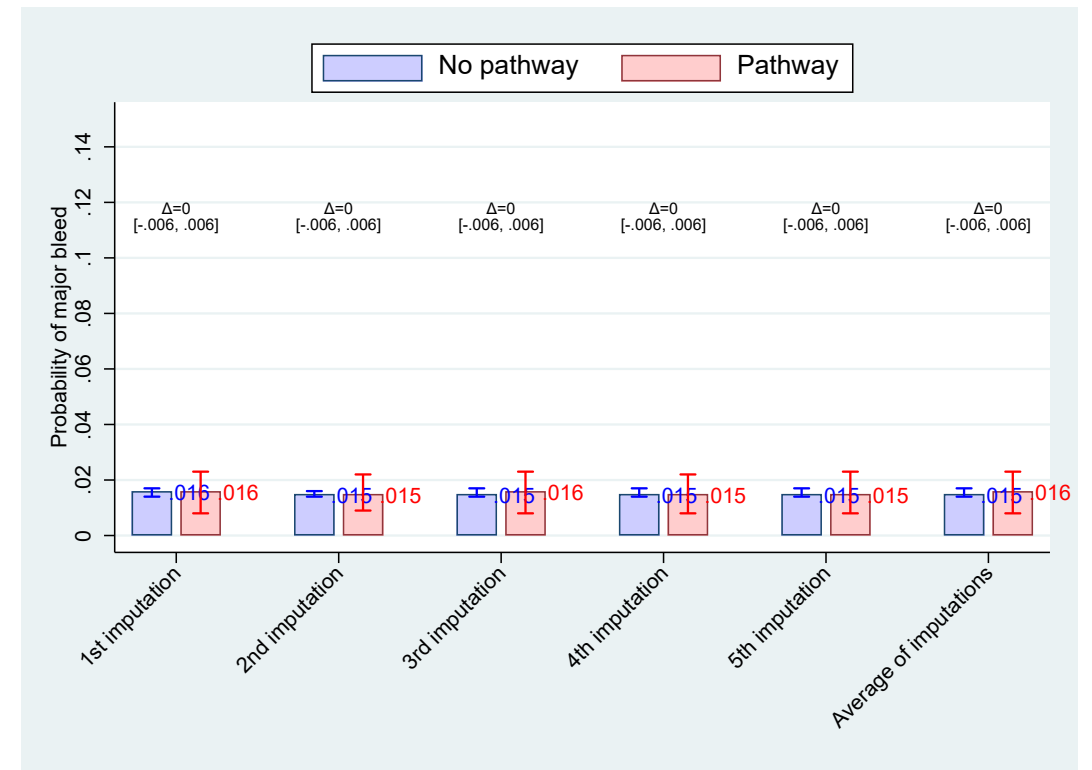

# SA-Diagnostics for overlap assumption and for balance in the covariate distribution between treated (on FFT-algorithm) and untreated (off FFT-algorithm): major bleed

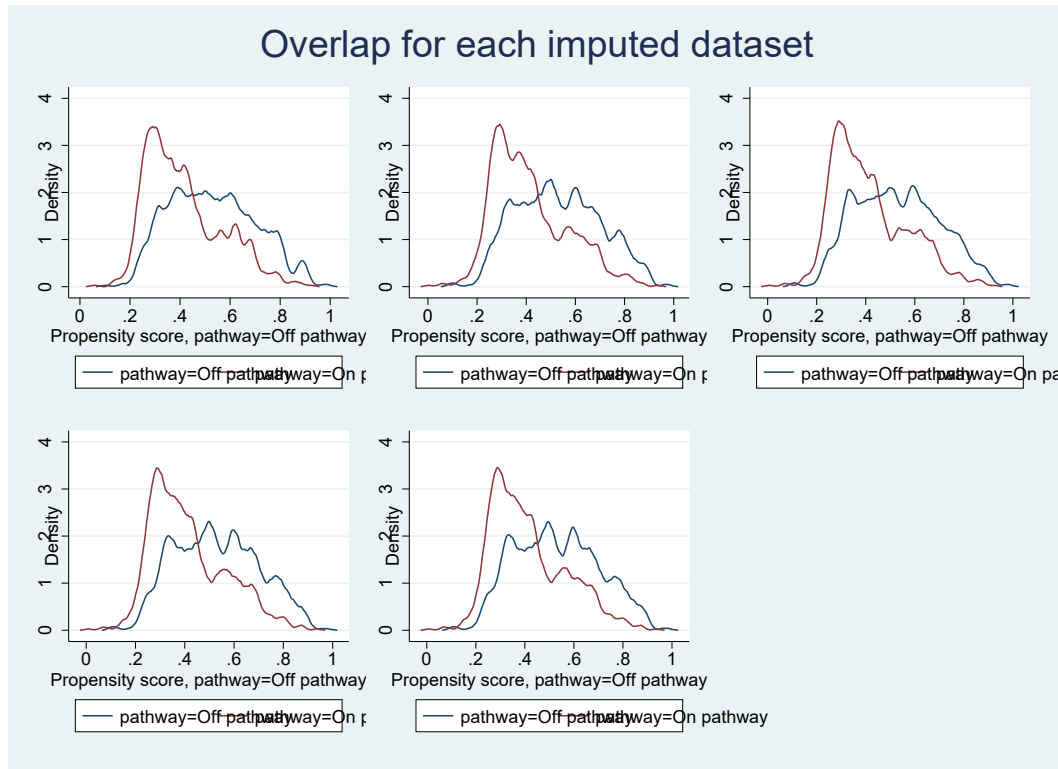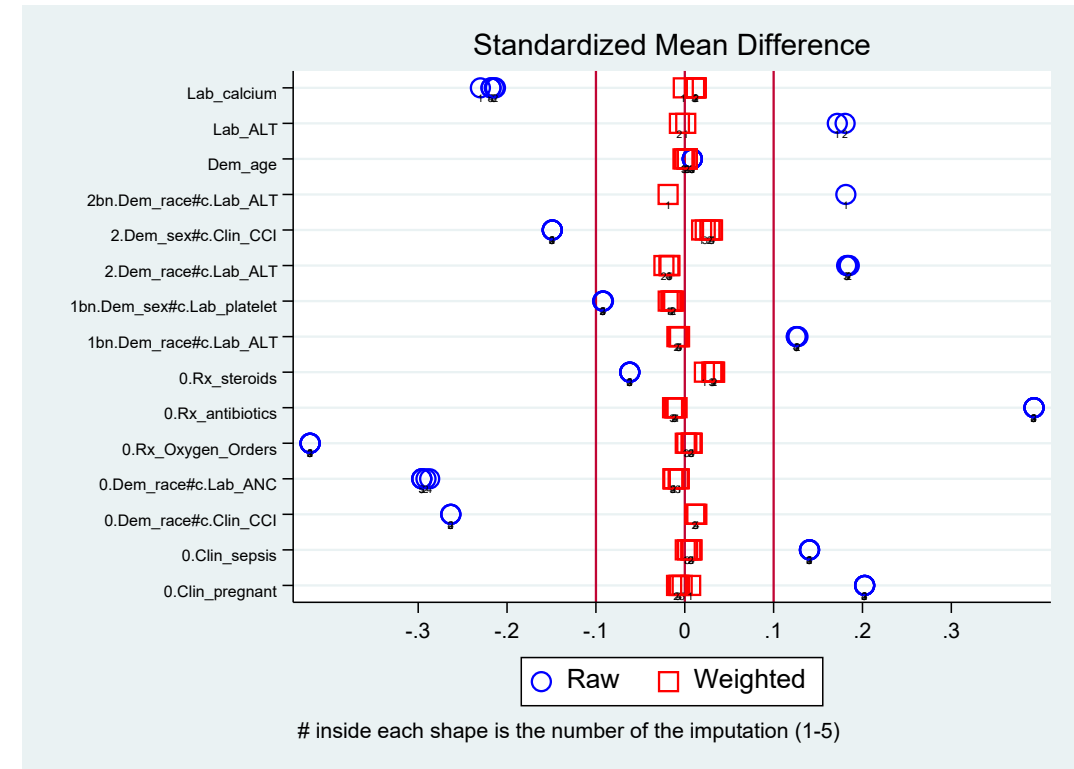

# Sensitivity analyses: B) AC switch dropped

# SA- Effect of FFT algorithm on outcomes: death

## All data



## After dropping AC switch

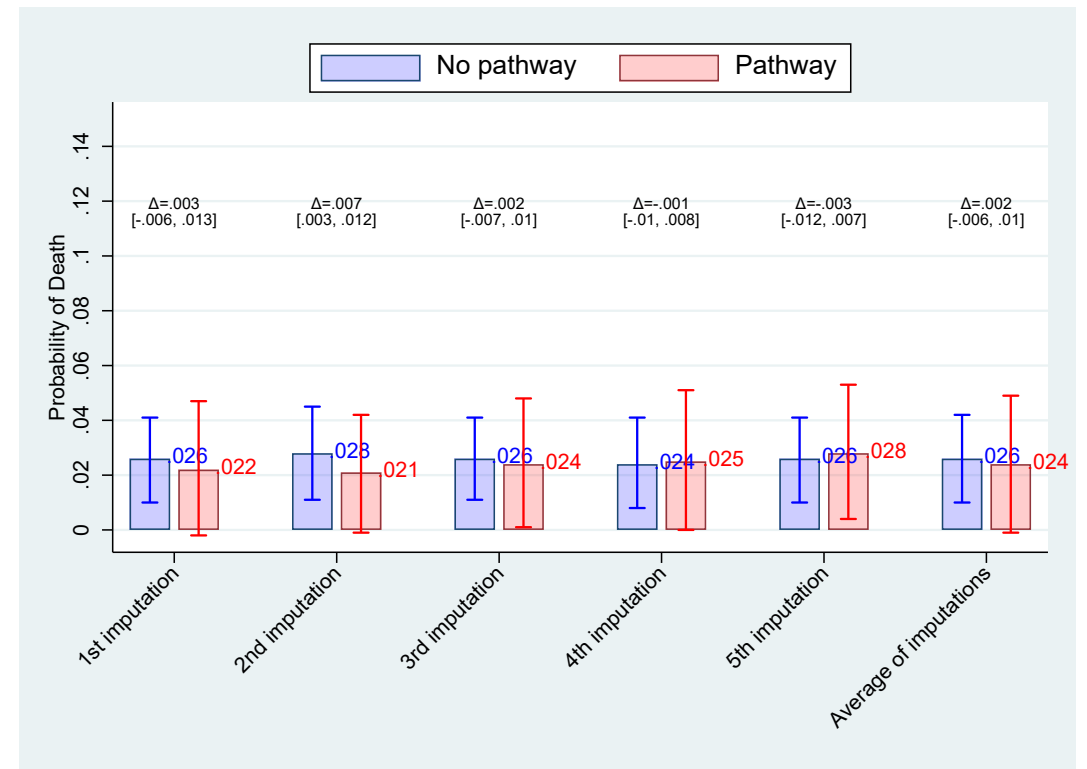

# SA-Diagnostics for overlap assumption and for balance in the covariate distribution between treated (on FFT-algorithm) and untreated (off FFT-algorithm): death

Overlap for each imputed dataset

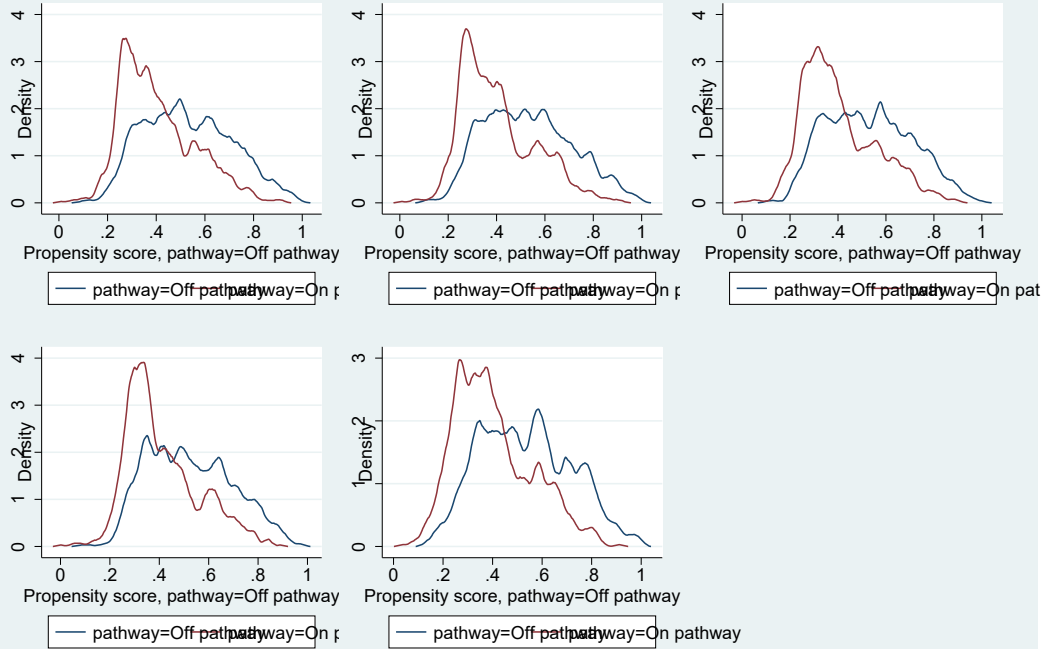

Standardized Mean Difference

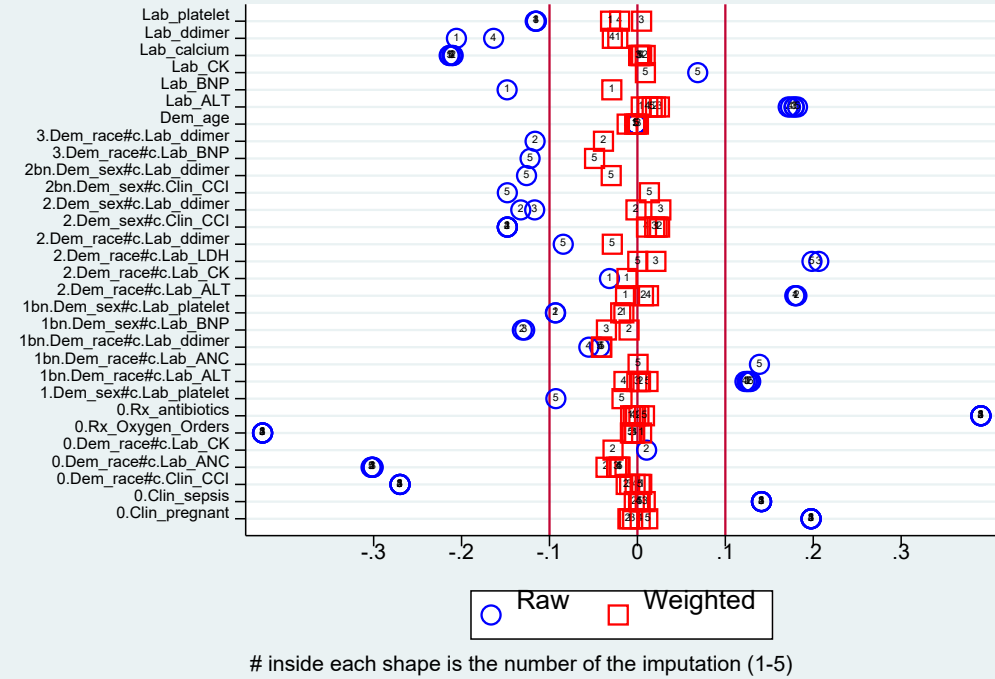



# SA-Effect of FFT algorithm on outcomes: VTE

## All data

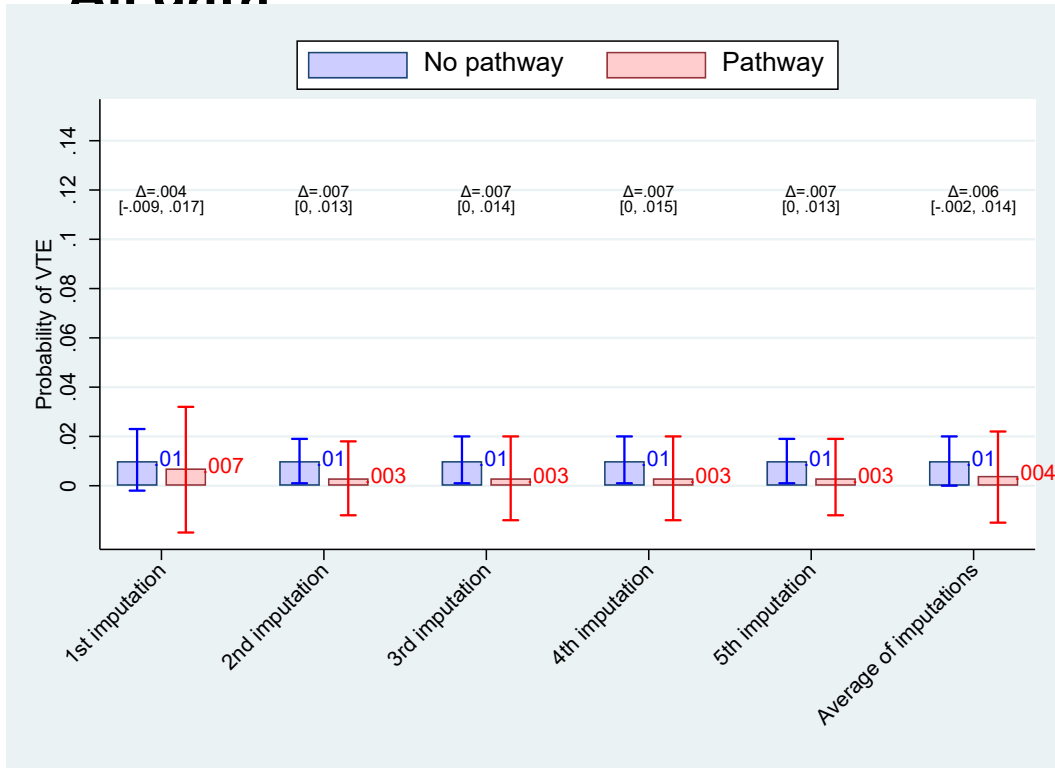

## After dropping AC switch

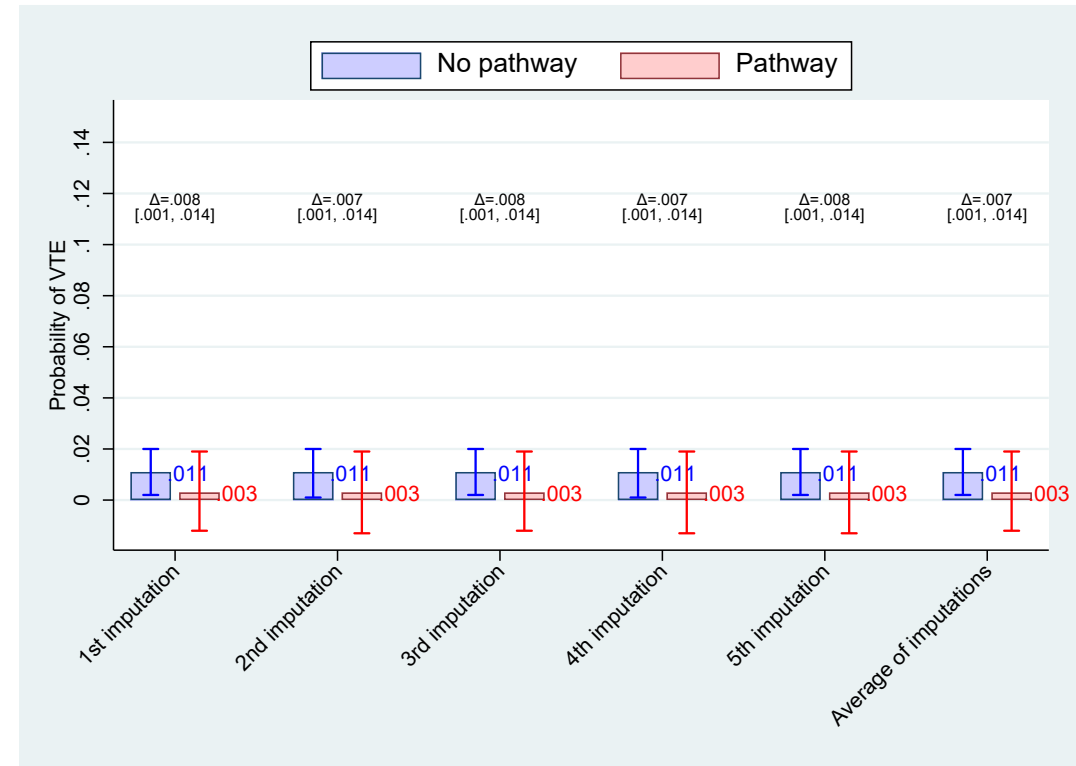

convergence could not be achieved using adaptive lasso; convergence achieved using plugin method

# SA-Diagnostics for overlap assumption and for balance in the covariate distribution between treated (on FFT-algorithm) and untreated (off FFT-algorithm): VTE

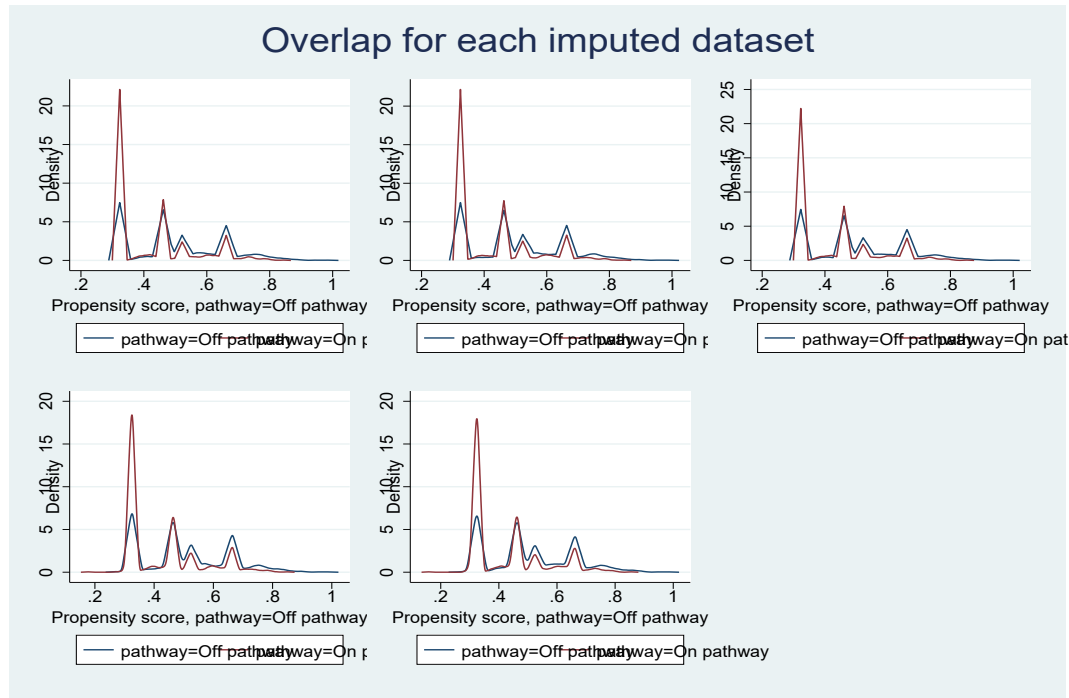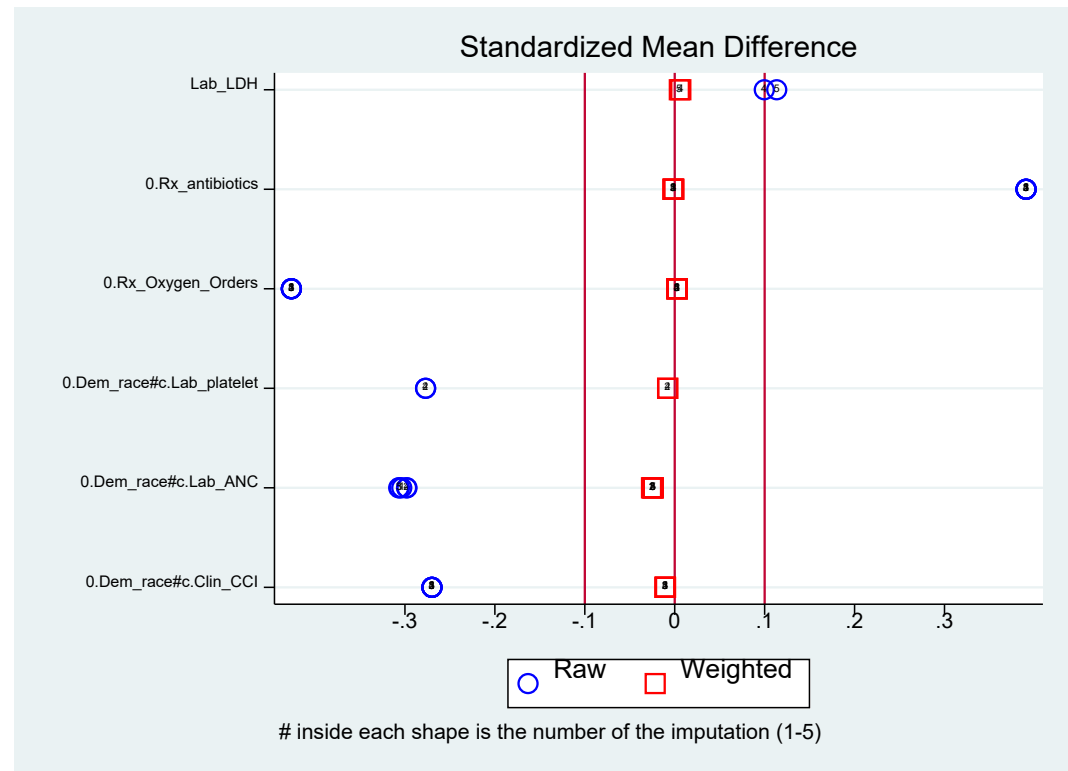

convergence could not be achieved using adaptive lasso; convergence achieved using plugin method

# SA-Effect of FFT algorithm on outcomes: major bleed

## All data

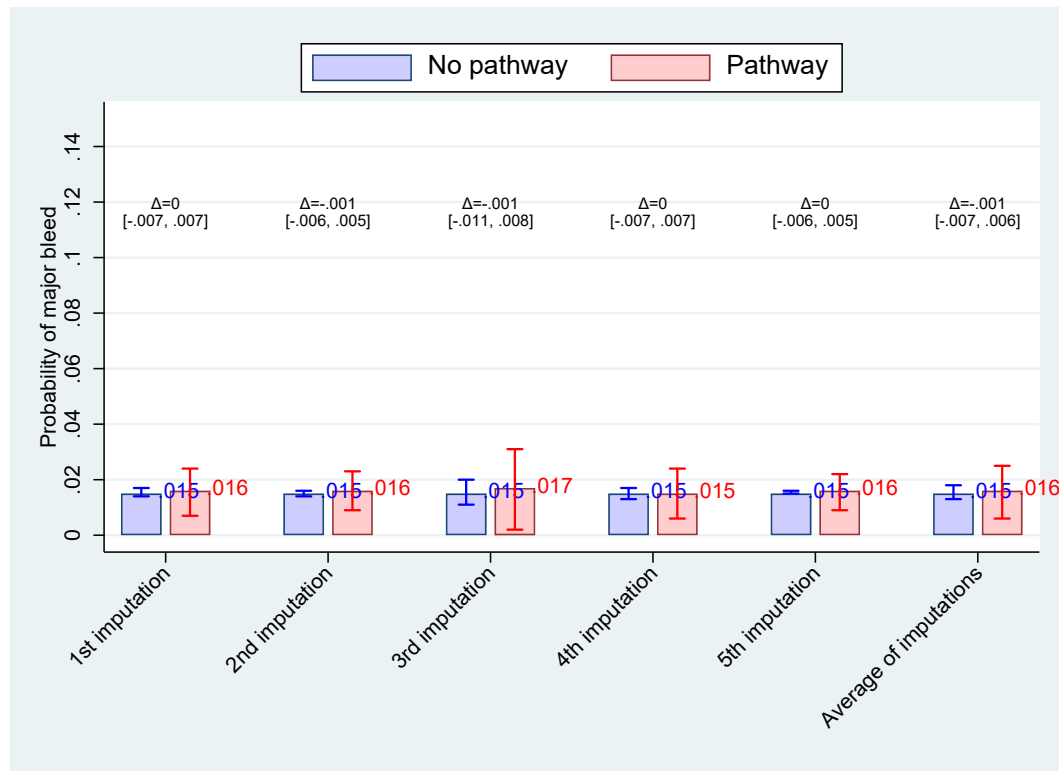

## After dropping AC switch

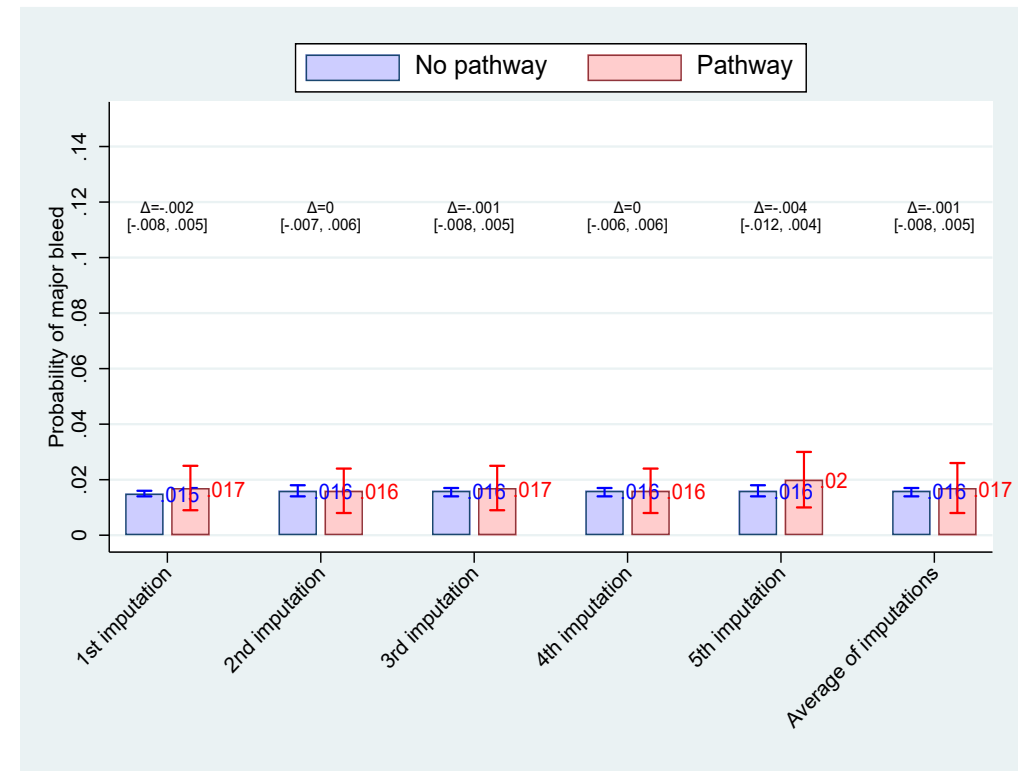

# SA-Diagnostics for overlap assumption and for balance in the covariate distribution between treated (on FFT-algorithm) and untreated (off FFT-algorithm): major bleed

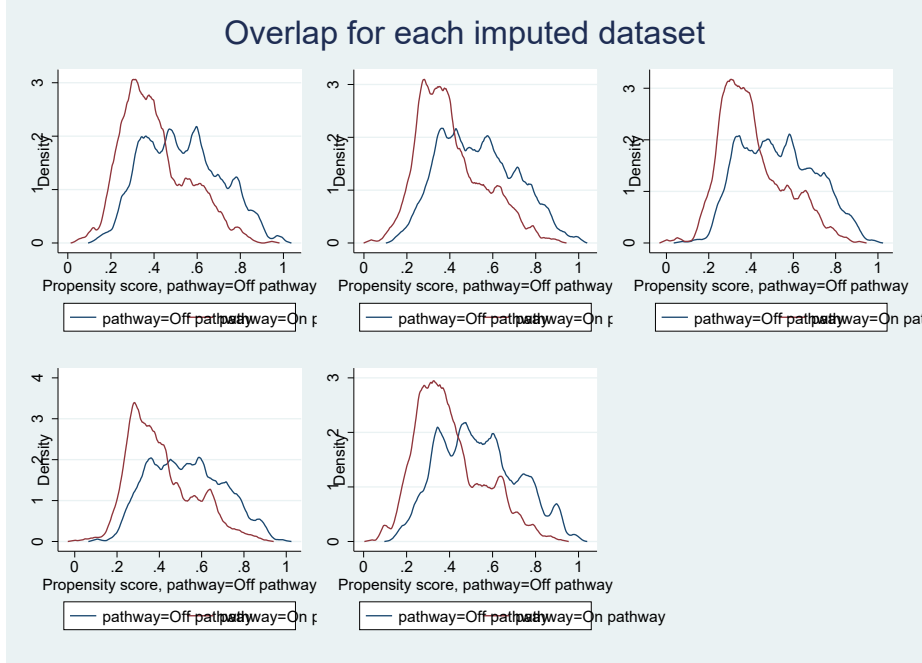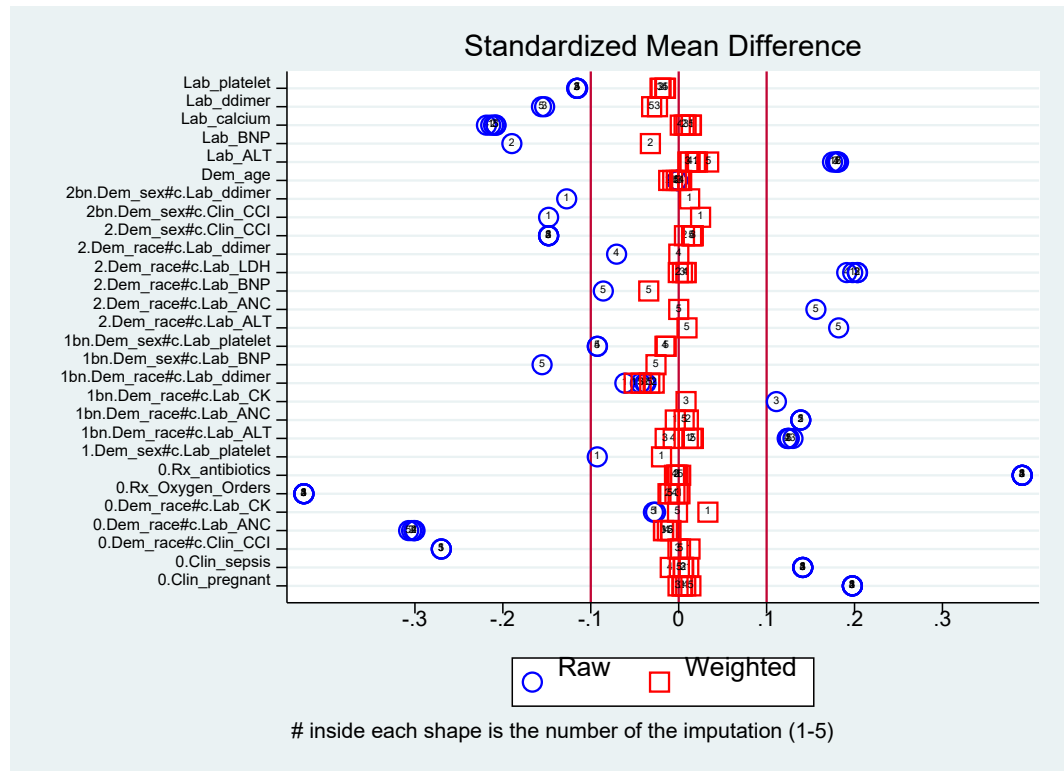

## Appendix 2

### App2\_Tables 1,2 and 3

**Lasso-propensity score regression analysis** showing pathway-FFT algorithm (vs. management off pathway) on primary outcome: **death, venous thromboembolism (VTE) and major bleed.**

The analysis displays ATE [The average treatment effect= the mean of the difference between outcomes of patients treated on - off pathway-FFT algorithm] as well as all regression coefficients selected by lasso for each imputation shown; as described in the manuscript, we used Rubin's rules to combine the imputed data sets into a final pooled estimate (see Fig 3, and Figures in Appendix #1)

## App Table 1: Telasso Regression analysis: effect of pathway-FFT algorithm on outcome: death#

### 1st imputation

| Out_Death                                       | Coefficient | Robust<br>std. err. | z     | P> z  | [95% conf. interval] |          |
|-------------------------------------------------|-------------|---------------------|-------|-------|----------------------|----------|
| ATE*                                            |             |                     |       |       |                      |          |
| pathway<br>(On<br>pathway vs<br>Off<br>pathway) | -.0020224   | .0041138            | -0.49 | 0.623 | -.0100853            | .0060405 |
| POmean<br>pathway<br>Off pathway                | .0261705    | .0081236            | 3.22  | 0.001 | .0102485             | .0420924 |

|                          | Out_Death(0) | Out_Death(1) | pathway |
|--------------------------|--------------|--------------|---------|
| Lab_ANC                  | 1.076        |              |         |
| Dem_age                  | 1.043        | 1.141        | 1.014   |
| Clin_BMI                 | 0.927        |              |         |
| Clin_CCI                 | 1.213        |              |         |
| 0.Clin_cultures_pos      | 0.412        |              |         |
| 0.Rx_antibiotics         | 0.145        | 0.226        | 1.790   |
| 0.Rx_antivirals          | 2.227        |              |         |
| 0bn.Dem_race#c.Lab_ANC   | 1.058        |              | 0.948   |
| 3.Dem_race#c.Lab_ANC     |              | 1.274        |         |
| 1.Dem_race#c.Lab_ANC     |              |              | 1.055   |
| 0bn.Dem_race#c.Lab_LDH   | 1.003        |              |         |
| 2.Dem_race#c.Lab_LDH     |              |              | 1.001   |
| 2.Dem_race#c.Clin_CCI    | 1.290        |              |         |
| 0bn.Dem_race#c.Clin_CCI  |              |              | 0.946   |
| 0.Rx_SuppO2              |              | 0.219        |         |
| 2bn.Dem_sex#c.Clin_CCI   |              | 1.235        | 0.876   |
| Lab_ALT                  |              |              | 1.003   |
| Lab_calcium              |              |              | 0.738   |
| Lab_ddimer               |              |              | 0.972   |
| 0.Clin_pregnant          |              |              | 2.571   |
| 0.Clin_sepsis            |              |              | 1.607   |
| 0.Rx_Oxygen_Orders       |              |              | 0.515   |
| 2bn.Dem_sex#c.Lab_ddimer |              |              | 0.920   |
| 1.Dem_sex#c.Lab_platelet |              |              | 0.998   |
| _cons                    | 0.004        | 0.000        | 2.093   |

## 2nd imputation

| Out_Death                                       | Coefficient | Robust<br>std. err. | z     | P> z  | [95% conf. interval] |          |
|-------------------------------------------------|-------------|---------------------|-------|-------|----------------------|----------|
| ATE                                             |             |                     |       |       |                      |          |
| pathway<br>(On<br>pathway vs<br>Off<br>pathway) | -.0008931   | .0053405            | -0.17 | 0.867 | -.0113602            | .0095741 |
| POmean                                          |             |                     |       |       |                      |          |
| pathway<br>Off pathway                          | .0262585    | .0080683            | 3.25  | 0.001 | .010445              | .042072  |

|                          | Out_Death(0) | Out_Death(1) | pathway |
|--------------------------|--------------|--------------|---------|
| Lab_ANC                  | 1.078        |              |         |
| Dem_age                  | 1.052        | 1.141        | 1.013   |
| Clin_BMI                 | 0.916        |              |         |
| Clin_CCI                 | 1.242        |              |         |
| 0.Clin_cultures_pos      | 0.335        |              |         |
| 0.Rx_antibiotics         | 0.117        | 0.200        | 1.821   |
| 0.Rx_antivirals          | 2.667        |              |         |
| 0bn.Dem_race#c.Lab_ANC   | 1.119        |              | 0.949   |
| 3.Dem_race#c.Lab_ANC     |              | 1.291        |         |
| 1.Dem_race#c.Lab_ANC     |              |              | 1.044   |
| 0bn.Dem_race#c.Lab_CK    | 1.001        |              |         |
| 2.Dem_race#c.Lab_CK      |              |              | 0.999   |
| 0bn.Dem_race#c.Lab_BNP   | 1.001        |              |         |
| 2.Dem_race#c.Lab_BNP     | 1.001        |              |         |
| 1bn.Dem_sex#c.Lab_ddimer | 0.729        |              |         |
| 2.Dem_sex#c.Clin_CCI     | 1.011        | 1.300        | 0.901   |
| Lab_CK                   |              | 0.999        |         |
| 0.Rx_Oxygen_Orders       |              | 0.434        | 0.517   |
| 0.Rx_SuppO2              |              | 0.264        |         |
| Lab_ALT                  |              |              | 1.002   |
| Lab_calcium              |              |              | 0.745   |
| Lab_ddimer               |              |              | 0.958   |
| Lab_platelet             |              |              | 0.999   |
| Lab_BNP                  |              |              | 1.000   |
| 0.Clin_pregnant          |              |              | 2.720   |
| 0.Clin_sepsis            |              |              | 1.532   |
| 0.Rx_steroids            |              |              | 0.820   |
| 1.Dem_race#c.Lab_ALT     |              |              | 1.003   |
| 2.Dem_race#c.Lab_ALT     |              |              | 1.001   |
| 2.Dem_race#c.Lab_LDH     |              |              | 1.001   |
| 1bn.Dem_sex#c.Lab_BNP    |              |              | 0.999   |
| 0bn.Dem_race#c.Clin_CCI  |              |              | 0.941   |
| _cons                    | 0.004        | 0.000        | 2.301   |

### 3rd imputation

| Out_Death                                       | Coefficient | Robust<br>std. err. | z     | P> z  | [95% conf. interval] |          |
|-------------------------------------------------|-------------|---------------------|-------|-------|----------------------|----------|
| ATE                                             |             |                     |       |       |                      |          |
| pathway<br>(On<br>pathway vs<br>Off<br>pathway) | -.0072832   | .0039297            | -1.85 | 0.064 | -.0149853            | .0004189 |
| POmean                                          |             |                     |       |       |                      |          |
| pathway<br>Off pathway                          | .0277195    | .008075             | 3.43  | 0.001 | .0118927             | .0435463 |

|                          | Out_Death(0) | Out_Death(1) | pathway |
|--------------------------|--------------|--------------|---------|
| Lab_ANC                  | 1.065        |              |         |
| Dem_age                  | 1.052        |              | 1.013   |
| Clin_CCI                 | 1.251        |              |         |
| 0.Clin_cultures_pos      | 0.284        |              |         |
| 0.Rx_antibiotics         | 0.142        |              | 1.841   |
| 0bn.Dem_race#c.Lab_ANC   | 1.063        |              | 0.923   |
| 0bn.Dem_race#c.Lab_CK    | 1.002        |              | 1.001   |
| Lab_ALT                  |              |              | 1.001   |
| Lab_calcium              |              |              | 0.741   |
| 0.Clin_pregnant          |              |              | 2.362   |
| 0.Clin_sepsis            |              |              | 1.511   |
| 0.Rx_Oxygen_Orders       |              |              | 0.515   |
| 0.Rx_steroids            |              |              | 0.833   |
| 1.Dem_race#c.Lab_ALT     |              |              | 1.007   |
| 2.Dem_race#c.Lab_ALT     |              |              | 1.003   |
| 0bn.Dem_race#c.Lab_BNP   |              |              | 0.999   |
| 2bn.Dem_sex#c.Lab_ddimer |              |              | 0.926   |
| 1.Dem_sex#c.Lab_platelet |              |              | 0.998   |
| 1.Dem_sex#c.Lab_BNP      |              |              | 1.000   |
| 0bn.Dem_race#c.Clin_CCI  |              |              | 0.949   |
| 2bn.Dem_sex#c.Clin_CCI   |              |              | 0.869   |
| _cons                    | 0.001        | 0.025        | 2.616   |

### 4th imputation

| Out_Death                                       | Coefficient | Robust<br>std. err. | z    | P> z  | [95% conf. interval] |          |
|-------------------------------------------------|-------------|---------------------|------|-------|----------------------|----------|
| ATE                                             |             |                     |      |       |                      |          |
| pathway<br>(On<br>pathway vs<br>Off<br>pathway) | .0004358    | .0039588            | 0.11 | 0.912 | -.0073232            | .0081948 |
| POmean                                          |             |                     |      |       |                      |          |
| pathway<br>Off pathway                          | .0257229    | .0086628            | 2.97 | 0.003 | .0087441             | .0427017 |



|                          | Out_Death(0) | Out_Death(1) | pathway |
|--------------------------|--------------|--------------|---------|
| Lab_ANC                  | 1.065        |              |         |
| Dem_age                  | 1.073        | 1.119        | 1.012   |
| Clin_CCI                 | 1.213        |              |         |
| 0.Clin_cultures_pos      | 0.298        |              |         |
| 0.Rx_antibiotics         | 0.107        | 0.222        | 1.796   |
| 0bn.Dem_race#c.Lab_ANC   | 1.150        |              | 0.958   |
| 3.Dem_race#c.Lab_ANC     |              | 1.258        |         |
| 0bn.Dem_race#c.Lab_CK    | 1.001        |              |         |
| 2.Dem_race#c.Lab_CK      |              | 1.001        |         |
| 2.Dem_race#c.Lab_BNP     | 1.001        |              |         |
| 1.Dem_race#c.Lab_BNP     |              | 1.002        |         |
| 1bn.Dem_sex#c.Lab_ddimer | 0.671        |              |         |
| 1bn.Dem_sex#c.Lab_BNP    |              | 1.002        | 1.000   |
| 2.Dem_sex#c.Clin_CCI     |              | 1.225        | 0.904   |
| Lab_ALT                  |              |              | 1.002   |
| Lab_calcium              |              |              | 0.723   |
| Lab_ddimer               |              |              | 0.951   |
| Lab_platelet             |              |              | 0.999   |
| Lab_BNP                  |              |              | 1.000   |
| 0.Clin_pregnant          |              |              | 2.766   |
| 0.Clin_sepsis            |              |              | 1.511   |
| 0.Rx_Oxygen_Orders       |              |              | 0.507   |
| 1.Dem_race#c.Lab_ALT     |              |              | 1.007   |
| 2.Dem_race#c.Lab_ALT     |              |              | 1.002   |
| 2.Dem_race#c.Lab_LDH     |              |              | 1.000   |
| 0bn.Dem_race#c.Clin_CCI  |              |              | 0.936   |
| _cons                    | 0.000        | 0.000        | 2.829   |

### 5th imputation

| Out_Death                                       | Coefficient | Robust<br>std. err. | z     | P> z  | [95% conf. interval] |          |
|-------------------------------------------------|-------------|---------------------|-------|-------|----------------------|----------|
| ATE                                             |             |                     |       |       |                      |          |
| pathway<br>(On<br>pathway vs<br>Off<br>pathway) | -.0021151   | .0034055            | -0.62 | 0.535 | -.0087899            | .0045596 |
| POmean<br>pathway<br>Off pathway                | .0251181    | .0085277            | 2.95  | 0.003 | .0084041             | .041832  |

|                        | Out_Death(0) | Out_Death(1) | pathway |
|------------------------|--------------|--------------|---------|
| Lab_ANC                | 1.074        |              |         |
| Dem_age                | 1.072        | 1.102        | 1.013   |
| Clin_CCI               | 1.267        | 1.290        |         |
| 0.Clin_cultures_pos    | 0.282        |              |         |
| 0.Rx_antibiotics       | 0.183        |              | 1.793   |
| 0bn.Dem_race#c.Lab_ANC | 1.063        |              | 0.937   |
| 0bn.Dem_race#c.Lab_LDH | 1.003        |              |         |

|                            |       |       |       |
|----------------------------|-------|-------|-------|
| 2.Dem_race#c.Lab_BNP       | 1.002 |       |       |
| 0bn.Dem_race#c.Lab_BNP     |       |       | 0.999 |
| Lab_ALT                    |       |       | 1.001 |
| Lab_calcium                |       |       | 0.726 |
| Lab_ddimer                 |       |       | 0.954 |
| 0.Clin_pregnant            |       |       | 2.338 |
| 0.Clin_sepsis              |       |       | 1.586 |
| 0.Rx_Oxygen_Orders         |       |       | 0.513 |
| 1.Dem_race#c.Lab_ALT       |       |       | 1.007 |
| 2.Dem_race#c.Lab_ALT       |       |       | 1.003 |
| 1bn.Dem_sex#c.Lab_platelet |       |       | 0.999 |
| 2.Dem_sex#c.Clin_CCI       |       |       | 0.862 |
| _cons                      | 0.000 | 0.000 | 2.881 |

\* ATE-The average treatment effect= the mean of the difference between outcomes of patients treated on - off pathway-FFT algorithm; POmean- potential-outcome means in population of patients treated off pathway-FFT algorithm; Out-outcome

#- regression for each imputation shown; as described in the manuscript, we used Rubin's rules to combine the imputed data sets into a final pooled estimate (see Fig 3, and Figures in Appendix)

## App Table 2: Telasso Regression analysis: effect of pathway-FFT algorithm on outcome: VTE#

### 1st imputation

| Out_VTE                                         | Coefficient | Robust<br>std. err. | z     | P> z  | [95% conf. interval] |           |
|-------------------------------------------------|-------------|---------------------|-------|-------|----------------------|-----------|
| ATE*                                            |             |                     |       |       |                      |           |
| pathway<br>(On<br>pathway vs<br>Off<br>pathway) | -.0074115   | .0035474            | -2.09 | 0.037 | -.0143643            | -.0004588 |
| POmean<br>pathway<br>Off pathway                | .0103436    | .0048368            | 2.14  | 0.032 | .0008637             | .0198235  |

|                          | Out_VTE(0) | Out_VTE(1) | pathway |
|--------------------------|------------|------------|---------|
| Lab_calcium              |            | 0.047      | 0.742   |
| 0.Clin_immunocomp        |            | 0.099      |         |
| 2bn.Dem_race#c.Clin_CCI  |            | 1.583      |         |
| 0.Dem_race#c.Clin_CCI    |            |            | 0.983   |
| Lab_BNP                  |            |            | 1.000   |
| 0.Clin_pregnant          |            |            | 3.599   |
| 0.Clin_sepsis            |            |            | 1.510   |
| 0.Rx_Oxygen_Orders       |            |            | 0.529   |
| 0.Rx_antibiotics         |            |            | 1.831   |
| 0.Rx_steroids            |            |            | 0.839   |
| 1.Dem_race#c.Lab_ALT     |            |            | 1.006   |
| 2bn.Dem_race#c.Lab_ALT   |            |            | 1.004   |
| 0.Dem_race#c.Lab_ANC     |            |            | 0.943   |
| 2bn.Dem_sex#c.Lab_ddimer |            |            | 0.919   |
| 1.Dem_sex#c.Lab_platelet |            |            | 0.999   |
| 2bn.Dem_sex#c.Clin_CCI   |            |            | 0.928   |
| _cons                    | 0.010      | 9.1e+08    | 3.585   |

### 2nd imputation

| Out_VTE | Coefficient | Robust<br>std. err. | z | P> z | [95% conf. interval] |
|---------|-------------|---------------------|---|------|----------------------|
| ATE     |             |                     |   |      |                      |

|                                                 |           |          |       |       |           |           |
|-------------------------------------------------|-----------|----------|-------|-------|-----------|-----------|
| pathway<br>(On<br>pathway vs<br>Off<br>pathway) | -.0067371 | .003436  | -1.96 | 0.050 | -.0134716 | -2.61e-06 |
| POmean<br>pathway<br>Off pathway                | .0097446  | .0047437 | 2.05  | 0.040 | .0004472  | .0190421  |

|                            | Out_VTE(0) | Out_VTE(1) | pathway |
|----------------------------|------------|------------|---------|
| 1bn.Dem_sex#c.Lab_CK       | 1.001      |            |         |
| Lab_calcium                |            | 0.047      | 0.741   |
| 0.Clin_immunocomp          |            | 0.099      |         |
| 2bn.Dem_race#c.Clin_CCI    |            | 1.582      |         |
| 0.Dem_race#c.Clin_CCI      |            |            | 0.944   |
| Dem_age                    |            |            | 1.012   |
| 0.Clin_pregnant            |            |            | 2.330   |
| 0.Clin_sepsis              |            |            | 1.580   |
| 0.Rx_Oxygen_Orders         |            |            | 0.510   |
| 0.Rx_antibiotics           |            |            | 1.812   |
| 0.Rx_steroids              |            |            | 0.792   |
| 1.Dem_race#c.Lab_ALT       |            |            | 1.007   |
| 2bn.Dem_race#c.Lab_ALT     |            |            | 1.006   |
| 0.Dem_race#c.Lab_ANC       |            |            | 0.939   |
| 2bn.Dem_race#c.Lab_CK      |            |            | 0.999   |
| 1bn.Dem_sex#c.Lab_platelet |            |            | 0.998   |
| 2.Dem_sex#c.Clin_CCI       |            |            | 0.861   |
| _cons                      | 0.007      | 9.1e+08    | 2.855   |

### 3rd imputation

| Out_VTE                                                | Coefficient | Robust<br>std. err. | z     | P> z  | [95% conf. interval] |          |
|--------------------------------------------------------|-------------|---------------------|-------|-------|----------------------|----------|
| ATE<br>pathway<br>(On<br>pathway vs<br>Off<br>pathway) | .0047945    | .0003704            | 12.94 | 0.000 | .0040684             | .0055206 |
| POmean<br>pathway<br>Off pathway                       | .0046462    | .0037258            | 1.25  | 0.212 | -.0026562            | .0119487 |

|                           | Out_VTE(0) | Out_VTE(1) | pathway |
|---------------------------|------------|------------|---------|
| Lab_calcium               |            | 0.000      | 0.737   |
| Lab_platelet              |            | 1.273      | 0.999   |
| Lab_LDH                   |            | 0.907      |         |
| 0.Clin_immunocomp         |            | 0.000      |         |
| 0.Rx_SuppO2               |            | 0.000      |         |
| 0.Rx_antivirals           |            | 8.5e+13    |         |
| 3bn.Dem_race#c.Lab_ddimer |            | 364.715    |         |
| 1.Dem_race#c.Lab_ddimer   |            |            | 0.618   |
| 0.Dem_race#c.Clin_CCI     |            | 3.2e+04    | 0.939   |
| 2.Dem_race#c.Clin_CCI     |            | 3564.490   |         |
| 3bn.Dem_race#c.Clin_CCI   |            | 0.000      |         |
| Lab_ALT                   |            |            | 1.001   |
| Dem_age                   |            |            | 1.012   |
| 0.Clin_pregnant           |            |            | 2.722   |
| 0.Clin_sepsis             |            |            | 1.649   |
| 0.Rx_Oxygen_Orders        |            |            | 0.533   |
| 0.Rx_antibiotics          |            |            | 1.852   |
| 0.Rx_steroids             |            |            | 0.831   |
| 1.Dem_race#c.Lab_ALT      |            |            | 1.005   |
| 2.Dem_race#c.Lab_ALT      |            |            | 1.002   |
| 0.Dem_race#c.Lab_ANC      |            |            | 0.934   |
| 1.Dem_race#c.Lab_ANC      |            |            | 1.142   |
| 2.Dem_race#c.Lab_LDH      |            |            | 1.000   |
| 0.Dem_race#c.Lab_CK       |            |            | 1.001   |
| 0.Dem_race#c.Lab_BNP      |            |            | 0.999   |
| 1.Dem_race#c.Lab_BNP      |            |            | 0.999   |
| 1bn.Dem_sex#c.Lab_BNP     |            |            | 1.000   |
| 2.Dem_sex#c.Clin_CCI      |            |            | 0.897   |
| _cons                     | 0.010      | 2.e+150    | 2.237   |

#### 4th imputation

| Out_VTE                                                | Coefficient | Robust<br>std. err. | z     | P> z  | [95% conf. interval] |           |
|--------------------------------------------------------|-------------|---------------------|-------|-------|----------------------|-----------|
| ATE<br>pathway<br>(On<br>pathway vs<br>Off<br>pathway) | -.0082549   | .0040354            | -2.05 | 0.041 | -.0161642            | -.0003457 |
| POmean<br>pathway<br>Off pathway                       | .0111116    | .0052283            | 2.13  | 0.034 | .0008645             | .0213588  |

|                         | Out_VTE(0) | Out_VTE(1) | pathway |
|-------------------------|------------|------------|---------|
| 1bn.Dem_sex#c.Lab_CK    | 1.001      |            |         |
| Lab_calcium             |            | 0.047      | 0.710   |
| 0.Clin_immunocomp       |            | 0.099      |         |
| 2bn.Dem_race#c.Clin_CCI |            | 1.583      |         |
| Lab_ALT                 |            |            | 1.003   |
| Lab_ddimer              |            |            | 0.955   |
| Lab_BNP                 |            |            | 1.000   |
| Dem_age                 |            |            | 1.010   |
| 0.Clin_pregnant         |            |            | 2.894   |
| 0.Rx_Oxygen_Orders      |            |            | 0.511   |
| 0.Rx_antibiotics        |            |            | 1.812   |
| 0.Dem_race#c.Lab_ANC    |            |            | 0.923   |
| 2bn.Dem_race#c.Lab_LDH  |            |            | 1.001   |
| 2.Dem_sex#c.Clin_CCI    |            |            | 0.914   |
| _cons                   | 0.007      | 9.1e+08    | 4.119   |

#### 5th imputation

| Out_VTE                                         | Coefficient | Robust<br>std. err. | z     | P> z  | [95% conf. interval] |           |
|-------------------------------------------------|-------------|---------------------|-------|-------|----------------------|-----------|
| ATE                                             |             |                     |       |       |                      |           |
| pathway<br>(On<br>pathway vs<br>Off<br>pathway) | -.0069147   | .0033913            | -2.04 | 0.041 | -.0135615            | -.0002679 |
| POmean                                          |             |                     |       |       |                      |           |
| pathway<br>Off pathway                          | .0098881    | .0046635            | 2.12  | 0.034 | .0007479             | .0190284  |

|                         | Out_VTE(0) | Out_VTE(1) | pathway |
|-------------------------|------------|------------|---------|
| Lab_calcium             |            | 0.047      | 0.750   |
| 0.Clin_immunocomp       |            | 0.099      |         |
| 2bn.Dem_race#c.Clin_CCI |            | 1.583      |         |
| Lab_ALT                 |            |            | 1.002   |
| Dem_age                 |            |            | 1.013   |
| 0.Clin_pregnant         |            |            | 2.696   |
| 0.Clin_sepsis           |            |            | 1.639   |
| 0.Rx_Oxygen_Orders      |            |            | 0.530   |
| 0.Rx_antibiotics        |            |            | 1.828   |
| 0.Dem_race#c.Lab_ANC    |            |            | 0.909   |
| 1.Dem_race#c.Lab_ANC    |            |            | 1.125   |
| 1.Dem_race#c.Lab_ddimer |            |            | 0.734   |

|                            |       |         |       |
|----------------------------|-------|---------|-------|
| 2bn.Dem_race#c.Lab_LDH     |       |         | 1.001 |
| 0.Dem_race#c.Lab_CK        |       |         | 1.001 |
| 1bn.Dem_sex#c.Lab_platelet |       |         | 0.999 |
| 1bn.Dem_sex#c.Lab_BNP      |       |         | 0.999 |
| 2.Dem_sex#c.Clin_CCI       |       |         | 0.843 |
| _cons                      | 0.010 | 9.1e+08 | 1.603 |

\* ATE-The average treatment effect= the mean of the difference between outcomes of patients treated on - off pathway-FFT algorithm; POmean- potential-outcome means in population of patients treated off pathway-FFT algorithm; Out-outcome

#- regression for each imputation shown; as described in the manuscript, we used Rubin's rules to combine the imputed data sets into a final pooled estimate (see Fig 3, and Figures in Appendix)

### App Table 3: Telasso Regression analysis: effect of pathway-FFT algorithm on outcome: major bleeding<sup>#</sup>

#### 1st imputation

| Out_Majorbleed                               | Coefficient | Robust<br>std. err. | z     | P> z  | [95% conf. interval] |          |
|----------------------------------------------|-------------|---------------------|-------|-------|----------------------|----------|
| ATE*                                         |             |                     |       |       |                      |          |
| pathway<br>(On pathway<br>vs<br>Off pathway) | .0000939    | .0034132            | 0.03  | 0.978 | -.0065958            | .0067836 |
| POMean                                       |             |                     |       |       |                      |          |
| pathway<br>Off pathway                       | .015467     | .0009158            | 16.89 | 0.000 | .0136721             | .0172618 |

#### 2nd imputation

| Out_Majorbleed                               | Coefficient | Robust<br>std. err. | z     | P> z  | [95% conf. interval] |          |
|----------------------------------------------|-------------|---------------------|-------|-------|----------------------|----------|
| ATE                                          |             |                     |       |       |                      |          |
| pathway<br>(On pathway<br>vs<br>Off pathway) | .0005002    | .0029064            | 0.17  | 0.863 | -.0051963            | .0061967 |
| POMean                                       |             |                     |       |       |                      |          |
| pathway<br>Off pathway                       | .0152938    | .000535             | 28.58 | 0.000 | .0142451             | .0163424 |

#### 3rd imputation

| Out_Majorbleed                               | Coefficient | Robust<br>std. err. | z    | P> z  | [95% conf. interval] |          |
|----------------------------------------------|-------------|---------------------|------|-------|----------------------|----------|
| ATE                                          |             |                     |      |       |                      |          |
| pathway<br>(On pathway<br>vs<br>Off pathway) | .0014724    | .004918             | 0.30 | 0.765 | -.0081666            | .0111115 |
| POMean                                       |             |                     |      |       |                      |          |
| pathway<br>Off pathway                       | .0152651    | .0023711            | 6.44 | 0.000 | .0106177             | .0199124 |



#### 4th imputation

| Out_Majorbleed                                      | Coefficient | Robust<br>std. err. | z     | P> z  | [95% conf. interval] |          |
|-----------------------------------------------------|-------------|---------------------|-------|-------|----------------------|----------|
| ATE<br>pathway<br>(On pathway<br>vs<br>Off pathway) | .0001379    | .003538             | 0.04  | 0.969 | -.0067964            | .0070722 |
| POmean<br>pathway<br>Off pathway                    | .015147     | .0011228            | 13.49 | 0.000 | .0129463             | .0173477 |

#### 5th imputation

| Out_Majorbleed                                      | Coefficient | Robust<br>std. err. | z     | P> z  | [95% conf. interval] |          |
|-----------------------------------------------------|-------------|---------------------|-------|-------|----------------------|----------|
| ATE<br>pathway<br>(On pathway<br>vs<br>Off pathway) | .0004079    | .0029727            | 0.14  | 0.891 | -.0054185            | .0062342 |
| POmean<br>pathway<br>Off pathway                    | .0153956    | .00028              | 54.98 | 0.000 | .0148467             | .0159444 |

\* ATE-The average treatment effect= the mean of the difference between outcomes of patients treated on - off pathway-FFT algorithm; POmean- potential-outcome means in population of patients treated off pathway-FFT algorithm

#- regression for each imputation shown; as described in the manuscript, we used Rubin's rules to combine the imputed data sets into a final pooled estimate (see Fig 3, and Figures in Appendix)

# Appendix 3

## Information Request Analysis Details

January 19, 2022

### Request Details

- Information Request: 208
- Requestor: Michael Barbee
- Title: Development of evidence-based decision support for the management of COVID19
- Analyst: Nag Tippireddy

### OBJECTIVE:

- Can the development of clinical guidelines panels (CPGs) leveraging fast and frugal decision trees (FFTs) improve clinical the management and outcomes of COVID19 patients?

### Requested Data:

The study requests clinical data on Rush's cohort of who were tested COVID Positive. Data are from different domains, including:

- Demographics
- Laboratory
- Medication
- Diagnosis/Condition
- Surgery/Procedures
- Other Miscellaneous data

### Dataset:

The output of analysis was exported to a set of Excel spreadsheet corresponding to domains of data. The spreadsheet was posted to an OneDrive folder that the requestor shared.

The following data dictionary describes the fields in the spreadsheet.

## DATA DICTIONARY

### Inclusion criteria:

The dataset includes all COVID Positive patients as per the Algorithm 3.

### Algorithm 3: one-sided window

# Appendix 3

## Information Request Analysis Details

January 19, 2022

Algorithm 3 is like Algorithm 1, except that only encounters that occur after positive results are included.

As with Algorithm 1,

- If a positive test result occurs during an encounter, the encounter is considered COVID-19 positive.
- If there is a negative result between the positive result and the admission, the encounter will be excluded.

The following columns from the dataset set namely DepartmentName, DepartmentSpecialty, AdmissionSource, and DischargeDisposition will help to filter out subsequent hospice or acute rehab encounter

### Resolution:

The dataset will have one row per positive encounter for unique patient.

### Data Dictionary:

| Column Name          | Description                             | Comment                                      |
|----------------------|-----------------------------------------|----------------------------------------------|
| MRN                  | Identify Unique patient                 | Patient MRN                                  |
| Sex                  | Patient Sex                             |                                              |
| Age                  | Patient Age                             | Age at the time of encounter                 |
| AgeBinned            | Patient Age grouped                     |                                              |
| Ethnicity            | Patient Ethnicity                       |                                              |
| Race                 | Patient Race                            |                                              |
| Death                | Death (Yes/No)                          | Patient live status                          |
| Pregnant             | Pregnant (Yes/No)                       | Patient is Pregnant at the time of Encounter |
| COVID                | Lab test indicates Positive or Negative |                                              |
| Date of admission    | Patient Admission Date                  |                                              |
| Date of Discharge    | Patient Discharge Date                  |                                              |
| DepartmentName       | Name of the Department                  |                                              |
| DepartmentSpecialty  | Name of the specialty                   |                                              |
| AdmissionSource      | Source patient got admitted             |                                              |
| DischargeDisposition | Patient discharged                      |                                              |
| LOS_Greater_10       | Length Of Stay>=10 (Yes/No)             | length of stay ≥10 days then Yes             |

# Appendix 3

## Information Request Analysis Details

January 19, 2022

| Column Name            | Description                                          | Comment                                                                                                                                                                                                                                                                                                                                  |
|------------------------|------------------------------------------------------|------------------------------------------------------------------------------------------------------------------------------------------------------------------------------------------------------------------------------------------------------------------------------------------------------------------------------------------|
| ICU Admission          | Indicates if a patient is admitted to ICU (Yes/No)   | Patient in ICU then Yes                                                                                                                                                                                                                                                                                                                  |
| TotalICULengthOfStay   | No of ICU Days                                       | Total number of ICU days within the encounter                                                                                                                                                                                                                                                                                            |
| Mechanical Ventilation | Mechanical Ventilation (Yes/No)                      | if patient has any of these recorded at positive encounter then considered as <b>Yes</b><br>Ventilation_Flowsheets,<br>Ventilation_Orders,<br>Intubation_Flowsheets,<br>Intubation_Orders,<br>Extubation_Flowsheets,<br>Extubation_Orders,<br>LDA_name<br><br>These are variables that identify if patient was on mechanical ventilation |
| OSH Transfer           | Transfer (Yes/No)                                    | If Patient is transferred from other hospitals/clinics/facilities                                                                                                                                                                                                                                                                        |
| ECMO                   | ECMO (Yes/No)                                        | if patient has any of these recorded at positive encounter then considered as <b>Yes</b><br>ECMO_Flowsheets,<br>ECMO_Orders                                                                                                                                                                                                              |
| Oxygen_Orders          | Oxygen Orders (Yes/No)                               | Based on any order at any point during the encounter                                                                                                                                                                                                                                                                                     |
| Height                 | Patient Height (cms)                                 | Height recorded on patient encounter                                                                                                                                                                                                                                                                                                     |
| Weight                 | Patient Weight (Kgs)                                 | Weight recorded on patient encounter                                                                                                                                                                                                                                                                                                     |
| BMI                    | Patient BMI                                          | Calculated based on Height & Weight                                                                                                                                                                                                                                                                                                      |
| High-flow O2           | RUSH R RESPIRATORY OXYGEN FLOW RATE (l/min) (Yes/No) | Changed the column to look for Rush R Respiratory Delivery Device [3040003594] and if a patient has recorded values '2' and '3' considered as 'Yes'                                                                                                                                                                                      |

# Appendix 3

## Information Request Analysis Details

January 19, 2022

| Column Name               | Description                                              | Comment                                                                                                                                                                                                              |
|---------------------------|----------------------------------------------------------|----------------------------------------------------------------------------------------------------------------------------------------------------------------------------------------------------------------------|
|                           |                                                          | This variable identifies if the patient was on high flow oxygen or not                                                                                                                                               |
| Supplemental O2           | RUSH R PT ROOM AIR (Yes/No)                              | Changed the column to look for Rush R Respiratory Oxygen Flow Rate [3040010600] and if a patient has recorded values >0 considered as 'Yes'<br><br>Identifies patients who are on supplemental oxygen, not high flow |
| O2_saturation_95          | PULSE OXIMETRY (%) >=95% (Yes/No)                        | If patient encounter has pulse oximeter >=95 recorded then considered as Yes                                                                                                                                         |
| Creatinine                | Creatinine (continuous) (mg/dl)                          | Maximum value recorded at the time of encounter                                                                                                                                                                      |
| Creatinine clearance      | Creatinine clearance (continuous) (mg/dl)                | Maximum value recorded at the time of encounter                                                                                                                                                                      |
| Admission_Creatinin       | Creatinine (continuous) (mg/dl) at the time of admission | First Creatinine level at the time of admission                                                                                                                                                                      |
| Discharge_Creatinin       | Creatinine (continuous) (mg/dl) at the time of discharge | Most recent Creatinine level at the time of discharge                                                                                                                                                                |
| Cultures_Positive         | Category (Yes/No)                                        | If a patient is tested <b>positive microbiology/blood culture data</b> for CBLOOD considered as 'Yes'                                                                                                                |
| Ddimer                    | ddimer at the time of admission                          | First ddimer value at the time of admission                                                                                                                                                                          |
| Admission (AST, AST.....) | Admission values at the time of encounter                | Admission values for AST and ALT                                                                                                                                                                                     |
| Peak (AST, AST.....)      | Peak values at the time of encounter                     | Peak values for AST and ALT during the encounter                                                                                                                                                                     |
| Sepsis                    | Category (Yes/No)                                        | A40.xx/A41.xx family ICD10 Codes with diagnosis type Encounter and Hospital Problem                                                                                                                                  |

# Appendix 3

## Information Request Analysis Details

January 19, 2022

| Column Name                      | Description                                     | Comment                                                                                                                                                                              |
|----------------------------------|-------------------------------------------------|--------------------------------------------------------------------------------------------------------------------------------------------------------------------------------------|
|                                  |                                                 | See Tables below for Sepsis ICD 10 codes                                                                                                                                             |
| SepStart                         | Diagnosis registered date in EPIC/Patient Chart | Date when sepsis diagnosis was registered into chart<br><br>See Tables below for Sepsis ICD 10 codes used                                                                            |
| Immunocompromised                | Category (Yes/No)                               | D84.9 and all children, D84.821, D84.89, Z79.52, Z94.84 ICD10 Codes with diagnosis type Encounter and Hospital Problem<br><br>See table below for ICD 10 codes for Immunocompromised |
| ImmunoStart                      | Diagnosis registered date in EPIC/Patient Chart | Date when patient was registered as immunocompromised                                                                                                                                |
| VTE                              | Category (Yes/No)                               | I82.xx, I26.XX and I80.XX family ICD10 Codes with diagnosis type Encounter and Hospital Problem<br><br>See tables below for ICD 10 codes for VTE                                     |
| VTEStart                         | Diagnosis registered date in EPIC/Patient Chart | Date when patient was registered with VTE diagnosis                                                                                                                                  |
| Bleeding                         | Category (Yes/No)                               | ICD-10 codes for 'bleeding', 'blood' with diagnosis type Encounter and Hospital Problem'<br><br>See table below for ICD 10 codes for Bleeding                                        |
| BleedingStart                    | Diagnosis registered date in EPIC/Patient Chart | Date when patient was registered with Bleeding                                                                                                                                       |
| Heparin_induced_thrombocytopenia | Category (Yes/No)                               | D75.82 ICD10 Code with diagnosis type Encounter and Hospital Problem<br><br>Based on ICD 10 codes for HIT                                                                            |
| HITStart                         | Diagnosis registered date in EPIC/Patient Chart | Date when patient was registered with ICD 10 code for bleeding                                                                                                                       |

# Appendix 3

## Information Request Analysis Details

January 19, 2022

| Column Name                 | Description                                     | Comment                                                                                                                                                                |
|-----------------------------|-------------------------------------------------|------------------------------------------------------------------------------------------------------------------------------------------------------------------------|
| ESRD                        | Category (Yes/No)                               | N18.6 ICD10 Code with diagnosis type Encounter and Hospital Problem                                                                                                    |
| ESRDStart                   | Diagnosis registered date in EPIC/Patient Chart | Date when patient was registered with ICD 10 code for ESRD                                                                                                             |
| Non Major bleeding          | Category (Yes/No)                               | ICD 10 codes with diagnosis type Encounter and Hospital Problem<br><br>See table below for ICD-10 codes related to non-major bleeding                                  |
| NonMajorBleedingStart       | Diagnosis registered date in EPIC/Patient Chart | Date when patient was registered with ICD 10 code for non-major bleeding                                                                                               |
| Major_bleeding              | Category (Yes/No)                               | ICD 10 codes with diagnosis type Encounter and Hospital Problem<br><br>See table below for ICD-10 codes related to major bleeding                                      |
| MajorBleedingStart          | Diagnosis registered date in EPIC/Patient Chart | Date when patient was registered with ICD 10 code for Major bleeding                                                                                                   |
| Remdesivir                  | Category (Yes/No)- Therapy                      | If Patient is under remdesivir medication therapy at the time of positive encounter considered as Yes<br>Included all formulations of remdesivir                       |
| Totaltherapydays_Remdesivir | Remdesivir Duration of Therapy                  | Duration of therapy = the total number of remdesivir doses administered during the course of therapy                                                                   |
| Dexamethasone               | Category (Yes/No)- Therapy                      | If Patient is under Dexamethasone therapy medication at the time of positive encounter considered as Yes<br><br>Included all formulations of Dexamethasone (PO and IV) |

# Appendix 3

## Information Request Analysis Details

January 19, 2022

| Column Name                    | Description                                          | Comment                                                                                                                                                                                       |
|--------------------------------|------------------------------------------------------|-----------------------------------------------------------------------------------------------------------------------------------------------------------------------------------------------|
| Totaltherapydays_Dexamethasone | Dexamethasone Duration of Therapy                    | Duration of therapy = the total number of Dexamethasone doses administered during the course of therapy                                                                                       |
| Dexamethasone_Remdesivir       | Category (Yes/No)- Therapy                           | If Patient is under Remdesivir + Dexamethasone therapy at the time of positive encounter considered as Yes                                                                                    |
| Totaltherapydays_Combination   | Total Duration of Therapy (Dexamethasone+Remdesivir) | Changed to the count to minimum no of doses among Remdesivir and Dexamethasone                                                                                                                |
| Heparins                       | Category (Yes/No)- Treatment                         | Drugs with PharmaceuticalSubclass-Heparin and AdministrationAction (Given, New Bag ) considered as Yes and action                                                                             |
| Dose_Heparins                  | Heparins Duration of Therapy                         | Duration of therapy = the total number of Heparins doses administered during the course of therapy                                                                                            |
| Heparin_last_dose              | Dose of Heparin                                      | Last dose of Heparin taken by the patient during the encounter                                                                                                                                |
| DOAC                           | Category (Yes/No)- Treatment                         | Patient has any of the listed drugs at the time of encounter and AdministrationAction (Given, New Bag ) considered as Yes<br>Apixaban<br>Betrixaban<br>Dabigatran<br>Edoxaban0<br>Rivaroxaban |
| Dose_Apixaban                  | Apixaban Duration of Therapy                         | Duration of therapy = the total number of Apixaban doses administered during the course of therapy                                                                                            |
| Apixaban_last_dose             | Dose of Apixaban                                     | Last dose of Apixaban taken by the patient during the encounter                                                                                                                               |



# Appendix 3

## Information Request Analysis Details

January 19, 2022

| Column Name           | Description                     | Comment                                                                                                                       |
|-----------------------|---------------------------------|-------------------------------------------------------------------------------------------------------------------------------|
| Dose_Dabigatran       | Dabigatran Duration of Therapy  | Duration of therapy = the total number of Dabigatran doses administered during the course of therapy                          |
| Dabigatran_last_dose  | Dose of Dabigatran              | Last dose of Dabigatran taken by the patient during the encounter                                                             |
| Dose_Betrixaban       | Betrixaban Duration of Therapy  | Duration of therapy = the total number of Betrixaban doses administered during the course of therapy                          |
| Betrixaban_last_dose  | Dose of Betrixaban              | Last dose of Betrixaban taken by the patient during the encounter                                                             |
| Dose_Edoxaban         | Edoxaban Duration of Therapy    | Duration of therapy = the total number of Edoxaban doses administered during the course of therapy                            |
| Edoxaban_last_dose    | Dose of Edoxaban                | Last dose of Edoxaban taken by the patient during the encounter                                                               |
| Dose_Rivaroxaban      | Rivaroxaban Duration of Therapy | Duration of therapy = the total number of Rivaroxaban doses administered during the course of therapy                         |
| Rivaroxaban_last_dose | Dose of Rivaroxaban             | Last dose of Rivaroxaban taken by the patient during the encounter                                                            |
| LMWH                  | Category (Yes/No)-Treatment     | Drugs with PharmaceuticalSubclass- Low Molecular Weight Heparins and AdministrationAction (Given, New Bag ) considered as Yes |
| Dose_LMWH             | LMWH Duration of Therapy        | Duration of therapy = the total number of LMWH doses administered during the course of therapy                                |
| LMWH_last_dose        | Dose of LMWH                    | Last dose of LMWH taken by the patient during the encounter                                                                   |
| Antibiotics           | Category (Yes/No)-Treatment     | Drugs with TherapeuticClass - ANTIBIOTICS and                                                                                 |

# Appendix 3

## Information Request Analysis Details

January 19, 2022

| Column Name                | Description                 | Comment                                                                                                                                         |
|----------------------------|-----------------------------|-------------------------------------------------------------------------------------------------------------------------------------------------|
|                            |                             | AdministrationAction (Given, New Bag ) considered as Yes                                                                                        |
| Antivirals                 | Category (Yes/No)-Treatment | Drugs with TherapeuticClass - ANTIVIRALS and AdministrationAction (Given, New Bag ) considered as Yes<br>Included remdesivir in Antiviral drugs |
| Steroids                   | Category (Yes/No)-Treatment | Oral prednisone and dexamethasone(IV or Oral) considered and AdministrationAction (Given, New Bag ) as Yes                                      |
| ID_CONSULT                 | Category (Yes/No)           | If a patient has INFECTIOUS DISEASE consult after date of admission then considered as Yes                                                      |
| MATERNAL_CONSULT           | Category (Yes/No)           | If a patient MATERNAL CONSULT after date of admission then considered as Yes                                                                    |
| Charlson Comorbidity Index | Charlson score              | Calculated based on <a href="https://www.mdcalc.com/charlson-comorbidity-index-cci">https://www.mdcalc.com/charlson-comorbidity-index-cci</a>   |
| Lovenox                    | Category (Yes/No)-Treatment | Drugs with simple generic name = Enoxaparin and Therapeutic Class= ANTICOAGULANTS considered as Yes                                             |
| Lovenox Therapy            | Therapy category            | The lovenox indication of use i.e., treatment or prophylaxis                                                                                    |

### New Labs included (admission value and peak value):

1. AST
2. ALT
3. Direct bilirubin
4. LDH
5. ANC
6. Albumin
7. PTT
8. BUN
9. Calcium

# Appendix 3

## Information Request Analysis Details

January 19, 2022

- 10. CK
- 11. Ferritin
- 12. Platelet
- 13. BNP

### Major bleeding ICD 10 Code:

| ICD10   | Term                                                         |
|---------|--------------------------------------------------------------|
| K66.1   | Hemoperitoneum                                               |
| I31.0   | Chronic adhesive pericarditis                                |
| I60.9   | Nontraumatic subarachnoid hemorrhage, unspecified (CMS-HCC)  |
| I31.4   | Cardiac tamponade                                            |
| I31.9   | Disease of pericardium, unspecified                          |
| I61.9   | Nontraumatic intracerebral hemorrhage, unspecified (CMS-HCC) |
| E27.40  | Unspecified adrenocortical insufficiency (CMS-HCC)           |
| H44.819 | Hemophthalmos, unspecified eye                               |
| I62.1   | Nontraumatic extradural hemorrhage (CMS-HCC)                 |
| I31.8   | Other specified diseases of pericardium                      |
| I31.1   | Chronic constrictive pericarditis                            |
| I62.00  | Nontraumatic subdural hemorrhage, unspecified (CMS-HCC)      |
| I31.2   | Hemopericardium, not elsewhere classified                    |
| E27.1   | Primary adrenocortical insufficiency (CMS-HCC)               |
| H35.60  | Retinal hemorrhage, unspecified eye                          |
| I62.9   | Nontraumatic intracranial hemorrhage, unspecified (CMS-HCC)  |
| E27.2   | Addisonian crisis (CMS-HCC)                                  |

### Non- Major bleeding ICD 10 Code:

| ICD10  | Term                                                                      |
|--------|---------------------------------------------------------------------------|
| R04.1  | Hemorrhage from throat                                                    |
| R58    | Hemorrhage, not elsewhere classified                                      |
| K76.1  | Chronic passive congestion of liver                                       |
| K26.0  | Acute duodenal ulcer with hemorrhage                                      |
| K86.1  | Other chronic pancreatitis                                                |
| K25.6  | Chronic or unspecified gastric ulcer with both hemorrhage and perforation |
| K29.91 | Gastroduodenitis, unspecified, with bleeding                              |
| K94.09 | Other complications of colostomy                                          |

# Appendix 3

## Information Request Analysis Details

January 19, 2022

|          |                                                                                |
|----------|--------------------------------------------------------------------------------|
| I85.01   | Esophageal varices with bleeding (CMS-HCC)                                     |
| R04.2    | Hemoptysis                                                                     |
| M25.00   | Hemarthrosis, unspecified joint                                                |
| K57.31   | Diverticulosis of large intestine without perforation or abscess with bleeding |
| K29.51   | Unspecified chronic gastritis with bleeding                                    |
| M25.076  | Hemarthrosis, unspecified foot                                                 |
| S36.029A | Unspecified contusion of spleen, initial encounter                             |
| K31.89   | Other diseases of stomach and duodenum                                         |
| K05.5    | Other periodontal diseases                                                     |
| K29.60   | Other gastritis without bleeding                                               |
| K64.5    | Perianal venous thrombosis                                                     |
| I85.11   | Secondary esophageal varices with bleeding (CMS-HCC)                           |
| K28.2    | Acute gastrojejunal ulcer with both hemorrhage and perforation (CMS-HCC)       |
| M25.073  | Hemarthrosis, unspecified ankle                                                |
| S36.112A | Contusion of liver, initial encounter                                          |
| K64.9    | Unspecified hemorrhoids                                                        |
| K29.81   | Duodenitis with bleeding                                                       |
| K13.70   | Unspecified lesions of oral mucosa                                             |
| K26.4    | Chronic or unspecified duodenal ulcer with hemorrhage                          |
| K62.5    | Hemorrhage of anus and rectum                                                  |
| K27.0    | Acute peptic ulcer, site unspecified, with hemorrhage                          |
| R47.01   | Aphasia                                                                        |
| K26.6    | Chronic or unspecified duodenal ulcer with both hemorrhage and perforation     |
| K29.41   | Chronic atrophic gastritis with bleeding                                       |
| N00.9    | Acute nephritic syndrome with unspecified morphologic changes                  |
| K22.6    | Gastro-esophageal laceration-hemorrhage syndrome                               |
| K64.4    | Residual hemorrhoidal skin tags                                                |
| K25.2    | Acute gastric ulcer with both hemorrhage and perforation (CMS-HCC)             |
| K57.11   | Diverticulosis of small intestine without perforation or abscess with bleeding |
| R31.0    | Gross hematuria                                                                |
| K66.1    | Hemoperitoneum                                                                 |
| K57.33   | Diverticulitis of large intestine without perforation or abscess with bleeding |
| K29.61   | Other gastritis with bleeding                                                  |
| K06.1    | Gingival enlargement                                                           |
| M26.79   | Other specified alveolar anomalies                                             |

# Appendix 3

## Information Request Analysis Details

January 19, 2022

|         |                                                                                                       |
|---------|-------------------------------------------------------------------------------------------------------|
| K06.2   | Gingival and edentulous alveolar ridge lesions associated with trauma                                 |
| K76.89  | Other specified diseases of liver                                                                     |
| K25.4   | Chronic or unspecified gastric ulcer with hemorrhage                                                  |
| K28.4   | Chronic or unspecified gastrojejunal ulcer with hemorrhage                                            |
| K29.71  | Gastritis, unspecified, with bleeding                                                                 |
| M79.81  | Nontraumatic hematoma of soft tissue                                                                  |
| I88.1   | Chronic lymphadenitis, except mesenteric                                                              |
| K64.8   | Other hemorrhoids                                                                                     |
| R31.1   | Benign essential microscopic hematuria                                                                |
| R04.89  | Hemorrhage from other sites in respiratory passages                                                   |
| K25.0   | Acute gastric ulcer with hemorrhage                                                                   |
| K29.90  | Gastroduodenitis, unspecified, without bleeding                                                       |
| K22.11  | Ulcer of esophagus with bleeding                                                                      |
| K29.50  | Unspecified chronic gastritis without bleeding                                                        |
| K29.00  | Acute gastritis without bleeding                                                                      |
| K57.13  | Diverticulitis of small intestine without perforation or abscess with bleeding                        |
| K29.80  | Duodenitis without bleeding                                                                           |
| K27.4   | Chronic or unspecified peptic ulcer, site unspecified, with hemorrhage                                |
| R04.9   | Hemorrhage from respiratory passages, unspecified                                                     |
| N32.89  | Other specified disorders of bladder                                                                  |
| I86.8   | Varicose veins of other specified sites                                                               |
| K28.0   | Acute gastrojejunal ulcer with hemorrhage                                                             |
| K13.79  | Other lesions of oral mucosa                                                                          |
| I85.10  | Secondary esophageal varices without bleeding (CMS-HCC)                                               |
| K29.40  | Chronic atrophic gastritis without bleeding                                                           |
| K29.70  | Gastritis, unspecified, without bleeding                                                              |
| K92.0   | Hematemesis                                                                                           |
| K31.82  | Dieulafoy lesion (hemorrhagic) of stomach and duodenum                                                |
| K29.21  | Alcoholic gastritis with bleeding                                                                     |
| K29.20  | Alcoholic gastritis without bleeding                                                                  |
| K27.6   | Chronic or unspecified peptic ulcer, site unspecified, with both hemorrhage and perforation (CMS-HCC) |
| N89.8   | Other specified noninflammatory disorders of vagina                                                   |
| R31.9   | Hematuria, unspecified                                                                                |
| K29.01  | Acute gastritis with bleeding                                                                         |
| M25.069 | Hemarthrosis, unspecified knee                                                                        |

### Sepsis ICD10 Codes:

| ICD10 | Term |
|-------|------|
|-------|------|

# Appendix 3

## Information Request Analysis Details

January 19, 2022

|        |                                                                     |
|--------|---------------------------------------------------------------------|
| A41.02 | Sepsis due to methicillin resistant Staphylococcus aureus (CMS-HCC) |
| A41.89 | Other specified sepsis (CMS-HCC)                                    |
| A41.9  | Sepsis, unspecified organism (CMS-HCC)                              |

### Immunocompromised ICD10 Codes:

| ICD10   | Term                                                                                |
|---------|-------------------------------------------------------------------------------------|
| C92.10  | Chronic myeloid leukemia, BCR/ABL-positive, not having achieved remission (CMS-HCC) |
| D84.821 | Immunodeficiency due to drugs                                                       |
| C88.0   | Waldenstrom macroglobulinemia (CMS-HCC)                                             |
| C83.30  | Diffuse large B-cell lymphoma, unspecified site (CMS-HCC)                           |
| C91.10  | Chronic lymphocytic leukemia of B-cell type not having achieved remission (CMS-HCC) |
| C92.02  | Acute myeloblastic leukemia, in relapse (CMS-HCC)                                   |
| Z94.83  | Pancreas transplant status (CMS-HCC)                                                |
| C90.00  | Multiple myeloma not having achieved remission (CMS-HCC)                            |
| C83.10  | Mantle cell lymphoma, unspecified site (CMS-HCC)                                    |
| C85.80  | Other specified types of non-hodgkin lymphoma, unspecified site (CMS-HCC)           |
| C83.38  | Diffuse large b-cell lymphoma, lymph nodes of multiple sites (CMS-HCC)              |
| Z94.81  | Bone marrow transplant status (CMS-HCC)                                             |
| Z94.84  | Stem cells transplant status (CMS-HCC)                                              |
| D84.9   | Immunodeficiency, unspecified (CMS-HCC)                                             |
| Z94.4   | Liver transplant status (CMS-HCC)                                                   |
| C91.00  | Acute lymphoblastic leukemia not having achieved remission (CMS-HCC)                |
| C92.01  | Acute myeloblastic leukemia, in remission (CMS-HCC)                                 |
| Z94.0   | Kidney transplant status                                                            |

### VTE ICD10 Codes:

| ICD10   | Term                                                                                                 |
|---------|------------------------------------------------------------------------------------------------------|
| I82.421 | Acute embolism and thrombosis of right iliac vein (CMS-HCC)                                          |
| I80.203 | Phlebitis and thrombophlebitis of unspecified deep vessels of lower extremities, bilateral (CMS-HCC) |
| I26.92  | Saddle embolus of pulmonary artery without acute cor pulmonale (CMS-HCC)                             |
| I80.201 | Phlebitis and thrombophlebitis of unspecified deep vessels of right lower extremity (CMS-HCC)        |

# Appendix 3

## Information Request Analysis Details

January 19, 2022

|         |                                                                                                          |
|---------|----------------------------------------------------------------------------------------------------------|
| 180.209 | Phlebitis and thrombophlebitis of unspecified deep vessels of unspecified lower extremity (CMS-HCC)      |
| 182.413 | Acute embolism and thrombosis of femoral vein, bilateral (CMS-HCC)                                       |
| 180.232 | Phlebitis and thrombophlebitis of left tibial vein (CMS-HCC)                                             |
| 182.401 | Acute embolism and thrombosis of unspecified deep veins of right lower extremity (CMS-HCC)               |
| 182.411 | Acute embolism and thrombosis of right femoral vein (CMS-HCC)                                            |
| 182.419 | Acute embolism and thrombosis of unspecified femoral vein (CMS-HCC)                                      |
| 182.403 | Acute embolism and thrombosis of unspecified deep veins of lower extremity, bilateral (CMS-HCC)          |
| 182.429 | Acute embolism and thrombosis of unspecified iliac vein (CMS-HCC)                                        |
| 126.09  | Other pulmonary embolism with acute cor pulmonale (CMS-HCC)                                              |
| 182.412 | Acute embolism and thrombosis of left femoral vein (CMS-HCC)                                             |
| 182.4Y3 | Acute embolism and thrombosis of unspecified deep veins of proximal lower extremity, bilateral (CMS-HCC) |
| 180.10  | Phlebitis and thrombophlebitis of unspecified femoral vein (CMS-HCC)                                     |
| 180.13  | Phlebitis and thrombophlebitis of femoral vein, bilateral (CMS-HCC)                                      |
| 182.402 | Acute embolism and thrombosis of unspecified deep veins of left lower extremity (CMS-HCC)                |
| 182.422 | Acute embolism and thrombosis of left iliac vein (CMS-HCC)                                               |
| 182.423 | Acute embolism and thrombosis of iliac vein, bilateral (CMS-HCC)                                         |
| 182.431 | Acute embolism and thrombosis of right popliteal vein (CMS-HCC)                                          |
| 182.432 | Acute embolism and thrombosis of left popliteal vein (CMS-HCC)                                           |
| 182.433 | Acute embolism and thrombosis of popliteal vein, bilateral (CMS-HCC)                                     |

# Appendix 3

## Information Request Analysis Details

January 19, 2022

|         |                                                                                                           |
|---------|-----------------------------------------------------------------------------------------------------------|
| I82.4Y2 | Acute embolism and thrombosis of unspecified deep veins of left proximal lower extremity (CMS-HCC)        |
| I82.4Y9 | Acute embolism and thrombosis of unspecified deep veins of unspecified proximal lower extremity (CMS-HCC) |
| I26.99  | Other pulmonary embolism without acute cor pulmonale (CMS-HCC)                                            |
| I80.202 | Phlebitis and thrombophlebitis of unspecified deep vessels of left lower extremity (CMS-HCC)              |
| I82.409 | Acute embolism and thrombosis of unspecified deep veins of unspecified lower extremity (CMS-HCC)          |
| I82.439 | Acute embolism and thrombosis of unspecified popliteal vein (CMS-HCC)                                     |
| I82.4Y1 | Acute embolism and thrombosis of unspecified deep veins of right proximal lower extremity (CMS-HCC)       |
| I26.02  | Saddle embolus of pulmonary artery with acute cor pulmonale (CMS-HCC)                                     |
| I80.11  | Phlebitis and thrombophlebitis of right femoral vein (CMS-HCC)                                            |
| I80.12  | Phlebitis and thrombophlebitis of left femoral vein (CMS-HCC)                                             |
| I80.211 | Phlebitis and thrombophlebitis of right iliac vein (CMS-HCC)                                              |
| I80.292 | Phlebitis and thrombophlebitis of other deep vessels of left lower extremity (CMS-HCC)                    |

### Bleeding ICD10 Codes:

| ICD10   | Term                                                                                                                                              |
|---------|---------------------------------------------------------------------------------------------------------------------------------------------------|
| O99.113 | Other diseases of the blood and blood-forming organs and certain disorders involving the immune mechanism complicating pregnancy, third trimester |
| R03.0   | Elevated blood-pressure reading, without diagnosis of hypertension                                                                                |
| K29.71  | Gastritis, unspecified, with bleeding                                                                                                             |
| K57.90  | Diverticulosis of intestine, part unspecified, without perforation or abscess without bleeding                                                    |
| R78.89  | Finding of other specified substances, not normally found in blood                                                                                |
| R79.9   | Abnormal finding of blood chemistry, unspecified                                                                                                  |
| D72.828 | Other elevated white blood cell count                                                                                                             |
| K29.20  | Alcoholic gastritis without bleeding                                                                                                              |



# Appendix 3

## Information Request Analysis Details

January 19, 2022

|         |                                                                                                                         |
|---------|-------------------------------------------------------------------------------------------------------------------------|
| R79.89  | Other specified abnormal findings of blood chemistry                                                                    |
| D72.829 | Elevated white blood cell count, unspecified                                                                            |
| K29.50  | Unspecified chronic gastritis without bleeding                                                                          |
| K50.911 | Crohn's disease, unspecified, with rectal bleeding (CMS-HCC)                                                            |
| K57.40  | Diverticulitis of both small and large intestine with perforation and abscess without bleeding                          |
| Z67.91  | Unspecified blood type, rh negative                                                                                     |
| D72.9   | Disorder of white blood cells, unspecified                                                                              |
| K20.90  | Esophagitis, unspecified without bleeding                                                                               |
| K29.30  | Chronic superficial gastritis without bleeding                                                                          |
| K57.92  | Diverticulitis of intestine, part unspecified, without perforation or abscess without bleeding                          |
| K20.80  | Other esophagitis without bleeding                                                                                      |
| N93.9   | Abnormal uterine and vaginal bleeding, unspecified                                                                      |
| Z86.2   | Personal history of diseases of the blood and blood-forming organs and certain disorders involving the immune mechanism |
| D72.819 | Decreased white blood cell count, unspecified                                                                           |
| I85.11  | Secondary esophageal varices with bleeding (CMS-HCC)                                                                    |
| K57.20  | Diverticulitis of large intestine with perforation and abscess without bleeding                                         |
| D50.0   | Iron deficiency anemia secondary to blood loss (chronic)                                                                |
| R79.81  | Abnormal blood-gas level                                                                                                |

### Heparin induced thrombocytopenia ICD10 Codes:

| ICD10  | Term                                             |
|--------|--------------------------------------------------|
| D75.82 | Heparin induced thrombocytopenia (HIT) (CMS-HCC) |

### Cultures considered as Positive:

| Culture                                                  |
|----------------------------------------------------------|
| Cryptococcus neoformans                                  |
| Gram stain: Gram positive cocci                          |
| Gram stain: Gram variable coccobacilli seen in Anaerobic |
| Pseudomonas aeruginosa                                   |
| Streptococcus anginosus group                            |
| Gram positive cocci in clusters                          |
| Gram stain:                                              |
| Staphylococcus aureus                                    |
| Streptococcus salivarius                                 |
| Streptococcus group G                                    |

# Appendix 3

## Information Request Analysis Details

January 19, 2022

|                                                               |
|---------------------------------------------------------------|
| Gram positive rods seen in Aerobic bottle                     |
| Gram stain: Gram positive cocci in pairs, chains and clusters |
| Gram stain: Gram positive rods seen in Aerobic bottle         |
| Non-hemolytic Streptococci species                            |
| Candida glabrata                                              |
| Candida tropicalis                                            |
| Dermabacter species                                           |
| yeast in Aerobic bottle                                       |
| Corynebacterium species NOT C. jeikeium                       |
| Gram stain: budding yeast seen in Aerobic bottle              |
| Growth of Gram positive cocci in pairs and chains             |
| Klebsiella pneumoniae                                         |
| Prevotella oralis                                             |
| Citrobacter koseri                                            |
| Gram stain: Gram positive cocci in clusters                   |
| Gram stain: Gram positive rods seen in Anaerobic bottle       |
| Bacillus species NOT anthracis                                |
| Escherichia coli                                              |
| Growth of Gram positive rods                                  |
| Haemophilus influenzae                                        |
| Staphylococcus epidermidis                                    |
| Enterobacter aerogenes                                        |
| Enterobacter cloacae                                          |
| Enterococcus faecalis                                         |
| Gram stain: Gram positive cocci seen in Anaerobic bottle      |
| Growth of Budding yeast                                       |
| Klebsiella pneumoniae ssp pneumoniae                          |
| Pasteurella multocida                                         |
| Streptococcus pneumoniae                                      |
| Anaerobe                                                      |
| Diphtheroids                                                  |
| Gram stain: Gram positive cocci in pairs and chains           |
| Growth of Gram positive cocci in clusters                     |
| Methicillin Resistant Staphylococcus aureus                   |
| Micrococcus species                                           |
| Staphylococcus hominis                                        |
| Candida albicans                                              |
| Cutibacterium acnes                                           |
| Gram stain: Gram positive cocci in pairs and clusters         |
| Gram stain: Gram positive cocci in pairs and clusters seen in |

# Appendix 3

## Information Request Analysis Details

January 19, 2022

### Generic Names of Drugs:

| Heparins                        | DOAC                          | LMWH              | Steroids                       |
|---------------------------------|-------------------------------|-------------------|--------------------------------|
| heparin sodium, porcine/D5W     | dabigatran etexilate mesylate | enoxaparin sodium | methylprednisolone acetate     |
| heparin sodium, porcine/NS/PF   | apixaban                      |                   | prednisolone sodium phosphate  |
| heparin sod, pork in 0.45% NaCl | rivaroxaban                   |                   | ciprofloxacin HCl/dexameth     |
| heparin sodium, porcine/PF      |                               |                   | methylprednisolone             |
| heparin sodium, porcine         |                               |                   | prednisolone                   |
|                                 |                               |                   | dexamethasone sodium phosp/PF  |
|                                 |                               |                   | methylprednisolone sod succ/PF |
|                                 |                               |                   | dexamethasone                  |
|                                 |                               |                   | dexamethasone sodium phosphate |

### Generic Names of Antiviral Drugs:

| Antivirals                       |
|----------------------------------|
| dolutegravir sodium              |
| remdesivir                       |
| nevirapine                       |
| sofosbuvir/velpatasvir           |
| acyclovir sodium                 |
| valganciclovir HCl               |
| acyclovir                        |
| raltegravir potassium            |
| abacavir/dolutegravir/lamivudi   |
| emtricitabine/tenofovir alafenam |
| lamivudine                       |
| abacavir sulfate                 |

### Generic Names of Antibiotic Drugs:

# Appendix 3

## Information Request Analysis Details

January 19, 2022

|                                |
|--------------------------------|
| elviteg/cob/emtri/tenof alafen |
| bictegrav/emtricit/tenofov ala |
| tenofovir disoproxil fumarate  |
| entecavir                      |
| valacyclovir HCl               |
| lopinavir/ritonavir            |
| emtricitabine                  |
| emtricitabine/tenofovir (TDF)  |
| oseltamivir phosphate          |
| tenofovir alafenamide          |

|                                |
|--------------------------------|
| <b>Antibiotics</b>             |
| cefazolin sodium/D5W           |
| erythromycin base              |
| ethambutol HCl                 |
| penicillin V potassium         |
| silver sulfadiazine            |
| cefadroxil                     |
| cephalexin                     |
| linezolid in 0.9% sodium chlor |
| polymyxin B sulf/trimethoprim  |
| rifaximin                      |
| cefepime proxetil              |
| clarithromycin                 |
| clindamycin HCl                |
| levofloxacin in dextrose 5 %   |
| gentamicin in NaCl, iso-osm    |
| metronidazole/sodium chloride  |
| moxifloxacin HCl               |
| ofloxacin                      |
| penicillin G benzathine        |
| ampicillin sodium              |
| ciprofloxacin HCl              |
| clindamycin in 0.9 % sod chlor |
| dapsone                        |
| metronidazole                  |
| nitrofurantoin monohyd/m-cryst |
| tetracycline HCl               |
| tobramycin                     |
| vancomycin HCl                 |
| doxycycline hyclate            |
| gentamicin sulfate             |
| isoniazid                      |
| levofloxacin                   |
| cefdinir                       |
| cefepime HCl                   |
| ciprofloxacin HCl/dexameth     |
| doxycycline monohydrate        |
| mupirocin                      |
| cefazolin sodium               |
| cefazolin sodium/dextrose,iso  |

# Appendix 3

## Information Request Analysis Details

January 19, 2022

|                                |
|--------------------------------|
| cefoxitin sodium               |
| vancomycin HCl in 5 % dextrose |
| amikacin sulfate               |
| clindamycin phosphate          |
| meropenem                      |
| nitrofurantoin macrocrystal    |
| piperacillin-tazo-dextrose,iso |
| pyrazinamide                   |
| ampicillin sodium/sulbactam Na |
| ceftriaxone sodium             |
| clindamycin phosphate/D5W      |
| linezolid                      |
| rifampin                       |
| sulfamethoxazole/trimethoprim  |
| amoxicillin                    |
| azithromycin                   |
| bacitracin zinc                |
| cefazolin sodium in 0.9 % NaCl |
| ceftazidime                    |
| ertapenem sodium               |
| neomycin/bacitracin/polymyxinB |
| amoxicillin/potassium clav     |
| bacitracin                     |
| cefuroxime axetil              |
| ciprofloxacin in 5 % dextrose  |
| mupirocin calcium              |
| neomycin/polymyxin B/dexametha |
| tobramycin in 0.225% sod chlor |
| vancomycin/0.9 % sod chloride  |
